# 1 **Fine-scale genomic analyses of admixed individuals reveal**

## 2 **unrecognized genetic ancestry components in Argentina**

---

### 3 **Native American, African and European genetic ancestries in Argentina**

4 Pierre Luisi<sup>\*1</sup>, Angelina García<sup>1,2,3</sup>, Juan Manuel Berros<sup>4</sup>, Josefina Motti<sup>5</sup>, Darío  
5 Demarchi<sup>1,2,3</sup>, Emma Alfaro<sup>6,7</sup>, Eliana Aquilano<sup>8</sup>, Carina Argüelles<sup>9,10</sup>, Sergio  
6 Avena<sup>11,12</sup>, Graciela Bailliet<sup>8</sup>, Julieta Beltramo<sup>8,13</sup>, Claudio M. Bravi<sup>8</sup>, Mariela Cuello<sup>8</sup>,  
7 Cristina Dejean<sup>11,12</sup>, José Edgardo Dipierri<sup>7</sup>, Laura S. Jurado Medina<sup>8</sup>, José Luis  
8 Lanata<sup>14</sup>, Marina Muzzio<sup>8</sup>, María Laura Parolin<sup>15</sup>, Maia Pauro<sup>1,2,3</sup>, Paula B. Paz  
9 Sepúlveda<sup>8</sup>, Daniela Rodríguez Golpe<sup>8</sup>, María Rita Santos<sup>8</sup>, Marisol Schwab<sup>8</sup>, Natalia  
10 Silvero<sup>8</sup>, Jeremias Zubrzycki<sup>16</sup>, Virginia Ramallo<sup>17</sup>, Hernán Dopazo<sup>\*,18,19</sup>

11

12

13 **1.** Universidad Nacional de Córdoba, Facultad de Filosofía y Humanidades,  
14 Departamento de Antropología, Argentina

15

16 **2.** Instituto de Antropología de Córdoba (IDACOR), Consejo Nacional de  
17 Investigaciones Científicas y Técnicas – Universidad Nacional de Córdoba, Córdoba,  
18 Argentina

19

20 **3.** Universidad Nacional de Córdoba, Facultad de Filosofía y Humanidades, Museo de  
21 Antropología, Córdoba, Argentina.

22

23 **4.** Consejo Nacional de Investigaciones Científicas y Técnicas – Laboratorio de  
24 Análisis de Datos, Biocódices S.A, Buenos Aires, Argentina

25

26 **5.** Núcleo de Estudios Interdisciplinarios de Poblaciones Humanas de Patagonia  
27 Austral (NEIPHA), Consejo Nacional de Investigaciones Científicas y Técnicas –  
28 Universidad Nacional del Centro de la Provincia de Buenos Aires, Quequén,  
29 Argentina.

30

31 **6.** Instituto de Ecorregiones Andinas (INECOA), Consejo Nacional de Investigaciones  
32 Científicas y Técnicas – Universidad Nacional de Jujuy, Argentina

33

34 **7.** Instituto de Biología de la Altura, Universidad Nacional de Jujuy, Argentina

35

36 **8.** Instituto Multidisciplinario de Biología Celular (IMBICE), Consejo Nacional de  
37 Investigaciones Científicas y Técnicas – Comisión de Investigaciones Científicas –  
38 Universidad Nacional de La Plata, Argentina

39

40 **9.** Grupo de Investigación en Genética Aplicada (GIGA), Facultad de Ciencias Exactas,  
41 Químicas y Naturales, Departamento de Genética, Instituto de Biología Subtropical

42 (IBS) - Nodo Posadas, Universidad Nacional de Misiones (UNaM) – Consejo Nacional  
43 de Investigaciones Científicas y Técnicas, Posadas, Argentina.

44

45 **10.** Cátedra de Biología Molecular. Carrera de Medicina. Facultad de Ciencias de la  
46 Salud. Universidad Católica de las Misiones (UCAMI), Posadas, Argentina.

47

48 **11.** Instituto de Ciencias Antropológicas (ICA), Facultad de Filosofía y Letras,  
49 Universidad de Buenos Aires, Argentina

50

51 **12.** Centro de Estudios Biomédicos, Biotecnológicos, Ambientales y Diagnóstico  
52 (CEBBAD), Universidad Maimónides, Buenos Aires, Argentina,

53

54 **13.** Laboratorio de Análisis Comparativo de ADN, Corte Suprema de Justicia de la  
55 Provincia de Buenos Aires, La Plata, Argentina

56

57 **14.** Instituto de Investigaciones en Diversidad Cultural y Procesos de Cambio  
58 (IIDyPCa), Consejo Nacional de Investigaciones Científicas y Técnicas – Universidad  
59 Nacional de Río Negro, San Carlos de Bariloche, Argentina

60

61 **15.** Instituto de Diversidad y Evolución Austral (IDEAus), Consejo Nacional de  
62 Investigaciones Científicas y Técnicas – Centro Nacional Patagónico, Puerto  
63 Madryn, Argentina

64

65 **16.** Laboratorio de Genómica. Biocódices S.A., Buenos Aires, Argentina

66

67 **17.** Instituto Patagónico de Ciencias Sociales y Humanas (IPCSH) – Consejo Nacional  
68 de Investigaciones Científicas y Técnicas - Centro Nacional Patagónico, Puerto  
69 Madryn, Argentina

70

71 **18.** Departamento de Ecología, Genética y Evolución, Facultad de Ciencias Exactas y  
72 Naturales, Universidad de Buenos Aires, Argentina

73

74 **19.** Consejo Nacional de Investigaciones Científicas y Técnicas – Biocódices S.A.,  
75 Buenos Aires, Argentina

76

77 \* Corresponding Authors: [pierrespc@gmail.com](mailto:pierrespc@gmail.com), [dopazoh@gmail.com](mailto:dopazoh@gmail.com)

78

## 79        **1 Abstract**

80    We are at the dawn of the efforts to describe and understand the origins of genetic  
81    diversity in Argentina from high-throughput data. This knowledge is a primary step  
82    in the intent of deciphering the specific genetic bases of diseases and drug response  
83    in the country. Similarly to other populations across the Americas, genetic ancestry  
84    in Argentinean populations traces back into African, European and Native American  
85    ancestors, reflecting a complex demographic history with multiple migration and  
86    admixture events in pre- and post-colonial times. However, little is known about the  
87    sub-continental origins of these three main ancestries. We present new high-  
88    throughput genotyping data for 87 admixed individuals across Argentina. This data  
89    was combined to previously published data for admixed individuals in the region  
90    and then compared to different reference panels specifically built to run population  
91    structure analyses at a sub-continental level. Concerning the European and African  
92    ancestries, we confirmed previous results about their main origins, and we provide  
93    new insights into the presence of other origins that reflect historical records. As for  
94    the Native American ancestry, leveraging genotype data for archaeological samples in the  
95    region in order to gain temporal depth in our analyses, we could identify four Native  
96    American components segregating in modern Argentinean populations. Three of them  
97    are also found in modern South American populations and are specifically  
98    represented in Central Chile/Patagonia, Lowlands and Central Andes geographic  
99    areas. The fourth one may be specific to the Central Western region of Argentina.  
100    Identifying such component has not been straightforward since it is not well

101 represented in any genomic data from the literature. Altogether, we provide useful  
102 insights into the multiple population groups from different continents that have  
103 contributed to present-days genetic diversity in Argentina. We encourage the  
104 generation of massive genotype data locally to further describe the genetic structure  
105 in Argentina.

## 106 **2 Author Summary**

107 The human genetic diversity in Argentina reflects demographic mechanisms during  
108 which the European colonists invaded a territory where Native American  
109 populations were settled. During colonial period, the slave trade also prompted  
110 many African people to move to Argentina. Little is known about the origins of the  
111 Native American and African components in Argentinean populations nowadays.  
112 Genotyping data for 87 admixed individuals throughout Argentina was generated  
113 and data from the literature was re-analyzed to shed light on this question. We  
114 confirmed that most of the European genetic ancestry comes from the South,  
115 although several individuals are related to Northern Europeans. We found that  
116 African origins in Argentina trace back from different regions. As for the Native  
117 American ancestry, we identified that it can be divided into four main components  
118 that correspond to Central Chile/Patagonia, Lowlands, Central Andes and Central  
119 Western region of Argentina. In order to understand the specificity of the genetic  
120 diversity in Argentina, we should not rely on knowledge generated in other  
121 populations. Instead, more effort is required to generate specific massive genomic  
122 knowledge at the local level.

### 123        **3 Introduction**

124    Natural selection, genetic drift, migrations and admixture shape the genetic  
125    composition of human populations. In order to decipher the demographic history of  
126    populations and get insights into their specific genetic bases of diseases and drug  
127    response, it is primordial to first characterize their geographical genetic structure  
128    [1]. Much effort has been made at broad scales in South America. In this article, we  
129    present analyses at much finer scales for Argentina.

130    The first systematic investigation of human genetic variation in the country focused  
131    on a limited number markers either uniparental (mtDNA, Y-STRs, Y-SNP; [2–11] or  
132    autosomal (Short Tandem Repeats, Ancestry Informative Markers, Alu sequences,  
133    indels, and blood groups [12–17]). Studies based on autosomal markers identified  
134    an important inter-individual heterogeneity for the African, Native American and  
135    European genetic ancestry proportions [12–17]. Accordingly, most of the studies  
136    based on uniparental markers showed large differences in the genetic composition  
137    of Argentinean populations, accounting for the different demographic histories  
138    within the country [2,3,18–21,4–10,17]. A recently published book compiles most of  
139    these studies and others to give a general view about the admixture in Argentinean  
140    populations [22]. Although the idea of a 'white' country with most of inhabitant's  
141    descendants from European immigrants has now been rejected by these studies, the  
142    Argentine founding myth of a white and European nation remains perceptible today  
143    [23].

144 There is a wealth of information about the European ancestors, both from familial  
145 stories and from historical records. On the contrary, little is known about the  
146 African and Native American populations that contributed to the admixture events  
147 between the continental components. During the great wave of European  
148 immigration between the mid-19th to mid-20th centuries, people from Southern  
149 Europe (mainly Italy and Spain) settled in Argentina, along with migrants from  
150 Western Europe (mainly French), Central Europe (mainly German) and  
151 Northeastern Europe (mainly Poles, Ukrainians, Russians) [24]. Historical records  
152 attest that immigration waves from Southern Europe were predominant from this  
153 continent [24].

154 The presence of human groups of African origins in Argentina traces back to the  
155 slave trade that took place during colonial era, most of the time illegally, and is  
156 therefore poorly documented in historical records [25]. It is even very difficult to  
157 estimate how many African slaves were brought into current Argentinean territory.  
158 Moreover, most of the European people at that time were unaware of African  
159 societies with which they traded. Thus, the slaves were ethnically identified  
160 according to the last ship they boarded before travelling to the Americas [25,26].  
161 However, this is a poor proxy to infer their actual origins since captains often had to  
162 dock in different harbors along the African coasts in order to complete the human  
163 load. In addition, many slaves first arrived in Brazil and then were taken to the Río  
164 del Plata harbor to be finally distributed across the current Argentinean territory  
165 [25]. The latest Brazilian harbor is often the only source of origin information  
166 available. In addition, extrapolate the historical records from the entrance point to

167 the whole Argentinean territory is a hazardous task since the slaves origin and  
168 destination have been changing during colonial era according to varying economical  
169 interests and political situations [26,27]. Even then, historical records about the  
170 arrival flows of African slaves to Río de la Plata show that Luanda, in current Angola  
171 territory in Central Western region of Africa, was the main departure harbor,  
172 followed by harbors located in the Gulf of Guinean and on the coast of the present-  
173 day Senegalese, Gambian and Sierra Leone territories. The coasts of Indian Ocean, in  
174 the current territory of Mozambique, were also an important departure location  
175 [27–29].

176 As for the Native American component, it is difficult to study its origin focusing on  
177 present-day communities since their organization has changed drastically from the  
178 16th century, and the arrival of the first conquerors, until the beginning of the 20th  
179 century [23]. During the period of conquest and colonization, wars, diseases and  
180 forced labor decimated the Native populations. The system of colonial exploitation  
181 also often meant the relocation of individuals, families, and communities [30]. Then,  
182 the expansion of the nation-state by the late 19th Century can be described as a  
183 territorial annexation process and subjugation of the indigenous peoples  
184 perpetrated by the Argentinean national armed forces between 1876 and 1917 [31].  
185 For example, the mis-called Conquest of the Desert in the 1870s to integrate  
186 Patagonia into the Argentinean state caused that the indigenous populations were  
187 subjected to practices of extermination, deportations and social fragmentation [32].  
188 Moreover, the arbitrariness of several academic, historical, economic and political

189 factors have greatly influenced the classification of the Native American groups  
190 settled in the Argentinean territory

191 Recently, two articles presented high-throughput genotyping data for hundreds of  
192 thousands of autosomal markers through the genome for modern Argentine  
193 individuals, and provided the first inferences of which populations contributed to  
194 the admixture events among the three main continental components [33,34].

195 Homburger *et al.* studied 437 admixed individuals from urban centers in 5 South  
196 American countries: Argentina, Chile, Colombia, Ecuador and Peru. On the other  
197 hand, Muzzio *et al.* obtained genotype data from nearly 400 individuals from 12  
198 populations in Northern and Central Argentina using Illumina exome-based array  
199 technology [34]. In both studies, it was found that the European ancestry in  
200 Argentina is mainly explained by Italian and Iberian ancestry components according  
201 to the historical records. Homburger *et al.* observed a strong gradient in Native  
202 American ancestry of South American Latinos between Andean and other South  
203 American Native American populations. This gradient is associated with the country  
204 of origin and geography of local indigenous populations [33]. In addition, Muzzio *et*  
205 *al.* found that African ancestry is explained by a Western and a Bantu-influenced  
206 components and described a Native American component not represented in the  
207 1000 Genomes project (1KGP) [34].

208 Despite the progress in studying the genetic diversity of the Argentinean  
209 populations, the challenge of achieving a fine-scale knowledge has inevitably been  
210 scarce. In this context, studies of a wider region, namely South America, can provide  
211 important insights into the Native American specific genetic diversity in Argentina



212 and its origins. Ancient DNA analyses of the peopling of the Americas suggest that  
213 Native American populations of South America descend from two streams from  
214 Northern America: one mainly present in the Andes and another one present  
215 elsewhere [35]. These streams have replaced the first people settled in the region,  
216 whose ancestry was related to the Clovis culture [35]. Genetic continuity for the  
217 Native American component appears to have prevailed in the region ever since  
218 these replacements [35–37]. However, little is known about the legacy in modern  
219 populations of the different ancestries associated to the several waves of population  
220 arrivals in South America. Modern Native American populations in the Southern  
221 Cone of South America seems to be divided between a Lowlands component and  
222 another component that includes Andean, Central Chile and Patagonian populations  
223 [38]. A recent genomic study of ancient and modern populations from Central Chile  
224 and Western Patagonia further identified that they are differentiated from the  
225 Andean and Lowlands populations, supporting a differentiation process throughout  
226 South America [37]. In another recent genomic study of modern samples, in which  
227 the Southern Cone is only represented by Gran Chaco populations, it has been  
228 described a likely common lineage for non-Andean South Americans populations  
229 which do probably not share with the Andeans any common ancestor from Central  
230 America [39]. This supports the hypothesis of many migrations back to Central  
231 America different from the Andeans ancestors [39]. It has also been described that  
232 the genetic interactions between the peopling routes on both sides of the Andes  
233 were limited [39,40].

234 The Native American specific genetic diversity in South America has been studied  
235 focusing almost exclusively on indigenous communities. In many regions of  
236 Argentina, particularly where the Spanish conquerors settled (in the Northwest,  
237 Central and Central Western regions), indigenous communities did not maintain  
238 their traditional lifestyle. They have rather been incorporated as a workforce in the  
239 colonial society. The sedentary life of these communities at the moment of contact  
240 partially contributed to this phenomena [23]. The early assimilation to the colonial  
241 society made gradually indigenous identity invisible since the communities were  
242 then referred to as peasants [41,42]. It implied a cultural annihilation and several  
243 Argentinean regions were considered “Indian free” in the mid-20<sup>st</sup> century [43].  
244 However, the cultural incorporation did not necessarily imply a biological  
245 extinction. We argue that focusing only on indigenous communities by  
246 “implementing accurate sampling strategies and of selecting representative  
247 populations based on historical/linguistic and anthropological information”, as  
248 advocated by Gneccchi-Ruscione *et al.* [39] for example, is not sufficient to decipher  
249 the pre-Columbian history of Native Americans. Although studies based on such  
250 sampling strategies [37–39] provide decisive information to understand the  
251 evolutionary history of Native American ancestry [22], it implies to disregard many  
252 regions of the continent. This is particularly the case of Argentinean territory where  
253 only the extreme North and South, separated by ~ 3,700 kilometers, have been  
254 studied under this scope. Therefore, alternative strategies must be considered to fill  
255 this gap in the intent of describing the Native American ancestry.

256 Here, we carry out a fine-scale population genomic study to get insight into the  
257 genetic structure and the complex origins of the African, European and Native  
258 American ancestries in Argentina populations. Using Affymetrix, Axiom-Lat1 array  
259 technology, we genotyped 87 admixed individuals nationwide for more than  
260 800,000 SNPs covering coding and non-coding regions of the genome. Additionally,  
261 a dataset with close to 500 individuals from modern and ancient populations  
262 throughout South America was constructed. We also pulled together genotype data  
263 for over 1,600 individuals from some ~50 Sub-Saharan African populations from  
264 the literature. The new data generated in the present study, compared to those data  
265 sets, allowed to broaden the knowledge of the sub-continental origins of the three  
266 main genetic ancestries of Argentinean populations.

## 267 **4 Results and Discussion**

268 High-throughput genotyping data was generated for 87 admixed individuals  
269 throughout Argentina (**Fig 1** and **S1 Table**). For clarity in the visualization of the  
270 results, we used Administrative Regions to classify the admixed individuals  
271 analyzed as shown in **Fig 1**. This classification has not been used for any statistical  
272 analyses. The generated data was compared to different data sets to understand the  
273 origins of the genetic diversity in the country. These data sets are called **DS<n>** and  
274 are described in **S2 Table**.

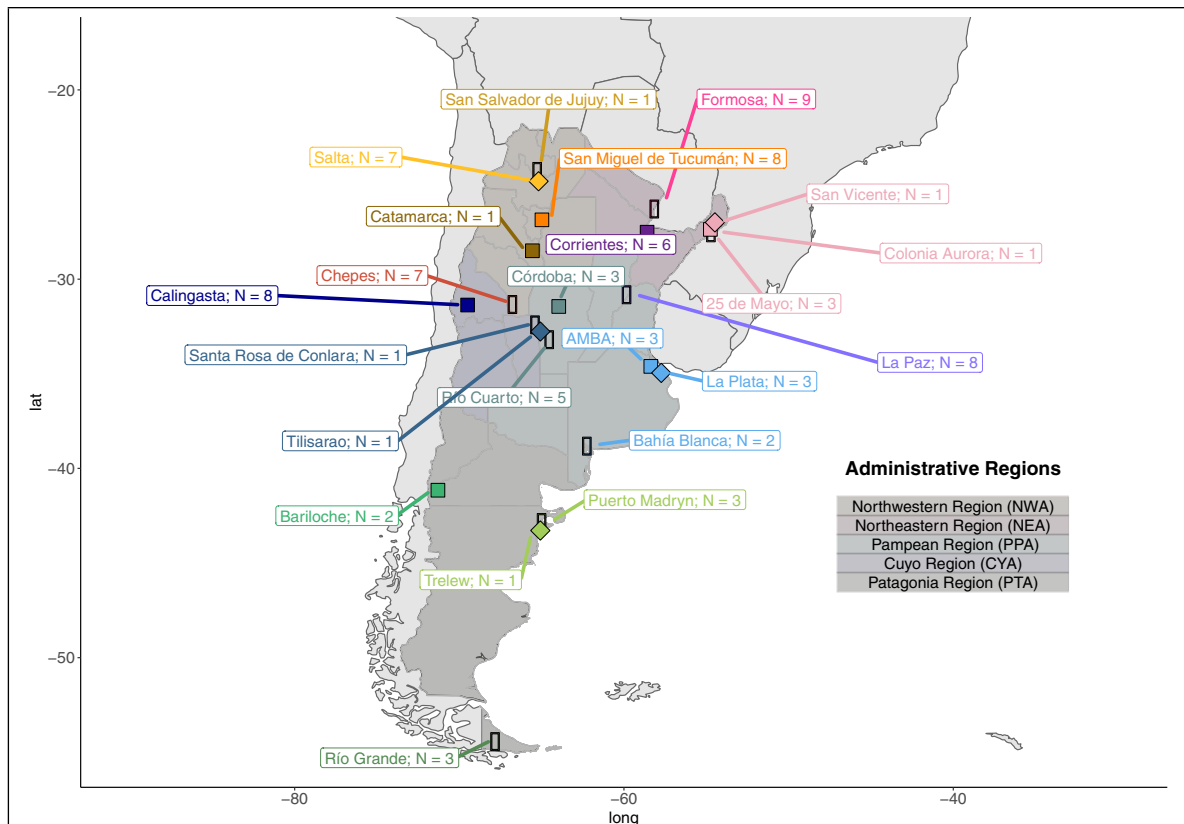

275

276 **Fig 1.** Sample locations from the present study.  
277 The samples are divided according to administrative regions for visualization only.  
278 N: The number of samples that passed genotyping Quality Controls.

#### 279 4.1 Ancestry in a worldwide context

280 In order to characterize the genetic diversity observed in Argentina within a  
281 worldwide genetic context, Principal Component Analysis (PCA [44]; **S1 Fig**) was  
282 applied to the dataset **DS1**, which contains genotype data for the samples from  
283 Argentina generated in the present study, as well as admixed and Native American  
284 individuals from South America characterized in previous studies [33,37,38] and  
285 individuals from Europe and Africa from the 1000 Genomes Project (1KGP; [45]).  
286 The PCA shows, as expected, that Argentinean individuals have different  
287 proportions of European, Native American and, much less represented, African

288 ancestry (**S1A Fig**). This pattern, which has already been documented in other  
289 admixed populations in South America [33,45], including in Argentina [14–17,34]  
290 supports the heterogeneous genetic origins throughout the country. The third and  
291 the fifth principal components discriminate three different main Native American  
292 ancestries that are also represented in the Argentinean samples. PC4 discriminates  
293 between Southern and Northern European individuals (**S1B Fig**) while PC6 divides  
294 Luhya population, a Bantu-speaking population in Kenya, to Western African  
295 populations (**S1C Fig**). The Argentinean samples do not exhibit any striking gradient  
296 along these two PCs. The ancestry composition of the Argentinean individuals will  
297 be discussed below.

298 We ran unsupervised clustering models with Admixture software [46] on **DS1**. We  
299 used from 3 to 12 putative ancestral populations ( $K$  ranging from 3 to 12).  
300 Comparing the cross-validation scores obtained for each run, we estimated that the  
301 genotype data analyzed was best explained with a model with  $K=8$  ancestral  
302 populations (**S2A Fig**). At  $K=3$  (**S2B Fig**), the algorithm allows estimating the  
303 proportions of European, Native American and African ancestry. For  $K=4$  to  $K=7$ ,  
304 (**S2C-F Figs**), the model detects sub-continental ancestries, i.e. it divides the main  
305 continental ancestry into different components, that are finally all observed in the  
306 model with  $K=8$  (**S2G Fig**). That is, the European ancestry is divided into Northern  
307 and Southern components, while African ancestry is composed of Westernmost  
308 African, Gulf of Guinea and Bantu-influenced components. Moreover, three  
309 components are observed for Native American ancestry: one represented in Central  
310 Chile/Patagonia populations (hereafter referred to as **CCP**), another present in

311 Central Andes populations (hereafter referred to as **CAN**) and a third one in  
312 populations mainly from Lowlands (here after referred to as **LWL**).

313 **S3 Table** lists, for individuals included in **DS1**, the proportion of continental  
314 ancestry estimated from the model with  $K=3$ , its proportion of sub-continental  
315 component estimated from the model with  $K=8$ , as well as the proportion of  
316 continental ancestry estimated from  $K=8$  (obtained from the sum of the sub-  
317 continental component proportions). We confirmed that the estimates of the  
318 continental ancestry proportion obtained from a model with  $K=3$  and  $K=8$  are highly  
319 consistent (**S3 Fig**).

320 From the Admixture results for  $K=8$  (**S2G Fig**), we observed that Peruvian and  
321 Chilean admixed samples [33] exhibit very low northern European ancestry  
322 proportions. The Native American ancestry for Peruvian admixed samples is mainly  
323 represented by CAN, although the Lowlands component is present in smaller  
324 proportions. Moreover, the Native American ancestry for the Chilean samples is  
325 mainly characterized by CCP. As for the Argentinean samples from both the present  
326 study and from [33], their European ancestry is divided by Southern and Northern  
327 components, the former being the most abundant. Arguably surprisingly, all three  
328 components of Native American ancestry are present in most Argentinean samples  
329 (**S2G Fig**). The low proportions of African ancestry in Argentinean samples makes  
330 difficult to interpret its sub-continental origins from analyses within a global  
331 context.

332 The Native American ancestry proportions are higher in our samples than in the  
333 Argentinean sample studied by [33] (**S4C Fig**; Wilcoxon test  $P = 2.57 \times 10^{-8}$ ). This  
334 could demonstrate that the selection of individuals with previously characterized  
335 uniparental Native American lineages can improve the overall representation of  
336 Native American ancestry in autosomal genomic regions, which would refute a  
337 previous study in Argentina [12]. However, this hypothesis can not be formally  
338 proven since our sample is almost exclusively composed of individuals with Native  
339 American uniparental lineages, and the genotyping data from [33] does not allow  
340 the inference of the uniparental lineages. Alternatively, this significant difference  
341 could also underscore that the exclusively urban samples from [33] do not allow the  
342 study of the total extent of Native American ancestry in the country. Moreover, the  
343 proportions of African ancestry are slightly higher in our samples than in the  
344 Argentinean sample studied by [33] (**S4A Fig** Wilcoxon test;  $P = 2.40 \times 10^{-2}$ ).  
345 Altogether, our sample is suitable for further studying the origins of Native  
346 American and African ancestry in Argentina.

## 347 **4.2 Sub-continental ancestry components in Argentina**

### 348 **4.2.1 Local Ancestry Estimates**

349 To explore the origins of the three main continental ancestries at a finer  
350 geographical level, we first estimated local ancestry patterns in phased **DS2** and  
351 **DS3** (**DS2p** and **DS3p**) separately. Across phased chromosomes, we assigned  
352 whether a genomic region was of Native American, European or African ancestry  
353 using RFMix v2 [47]. A sanity check confirmed that the ancestry proportions across

354 the genome estimated by local and global ancestry approaches are concordant (**S5**  
355 **Fig**). It seems that local ancestry, as compared to global ancestry, tends to  
356 overestimate the proportion of the genome with European ancestry while  
357 underestimating the proportion of African and Native American ancestry. The  
358 present article main conclusions concern the origins of African and Native American  
359 ancestries, and we argue that our approach of assigning regions to one of those two  
360 ancestries is conservative.

361 Next, we masked the data in order to keep, for each individual, only the regions with  
362 ditypes of a given ancestry, i.e. regions that exhibit the ancestry of interest on both  
363 chromosomes (**S6 Fig**; for details see Material and Methods).

364 To decipher the sub-continental origin(s) of the European, African and Native  
365 American ancestries segregating in Argentina, we applied principal component and  
366 unsupervised clustering analyses on the masked data compiled with reference data  
367 sets describing the genetic diversity within each continent (**S2 Table**).

#### 368 **4.2.2 European ancestry components in Argentina**

369 To explore the European origins of the Argentinean, we used **DS4**, a combination of  
370 the masked genotype data for admixed individuals with a set of individuals carefully  
371 selected to be representative of the genetic diversity in their sampling area [48,49].

372 We estimated that the genotype data analyzed was best explained with a model with  
373  $K=2$  ancestral populations for the unsupervised clustering model (**S7A Fig**).

374 Although it is rather difficult to assign a clear label to each of these two ancestral  
375 populations, it seems that the algorithm discriminates between Northern and



376 Southern Europe components (**S7B Fig**). For  $K=3$ , we observed that Iberians  
377 individuals exhibited a higher proportion of a new component highly represented in  
378 Southern American samples (**S7C Fig**). This pattern most likely reflects the legacy of  
379 first Iberian migrations in South America during colonial period [12].

380 From the PCA applied on the same dataset (**DS4**), we observed, as previously  
381 described [33,34], that most of the European ancestry of admixed Argentinean  
382 individuals clusters with Iberians and Italians (**S8 Fig**). However, some individuals  
383 trace their European ancestry back to Central or Northern Europe. Both PCA and  
384 Admixture showed that the individuals with higher proportion of Central / Northern  
385 Europe ancestry are from Misiones province (Northeastern region) (**S7** and **S8**  
386 **Figs**), consistent with the historical record of settlement of Polish, German, Danish  
387 and Swedish colonies promoted by governmental or private enterprises in the  
388 province [50]. This demonstrates that to identify the genetic legacy from secondary  
389 migration streams and thus better reflect the evolutionary history of populations in  
390 Argentina, it is primordial to increase the number of studied individuals in the  
391 country.

#### 392 **4.2.3 African ancestry components in Argentina**

393 To investigate the sub-continental components that explains African ancestry in  
394 Argentina, we used **DS5** which combines masked genotype data from admixed  
395 individuals with a published data set of African individuals [45,51–53] (**Fig 2A**). The  
396 African reference populations used here can be divided into five main groups:

397 Bantu-influenced, Hunter-Gatherers, Western Africa, San and Eastern Africa  
 398 populations [51].

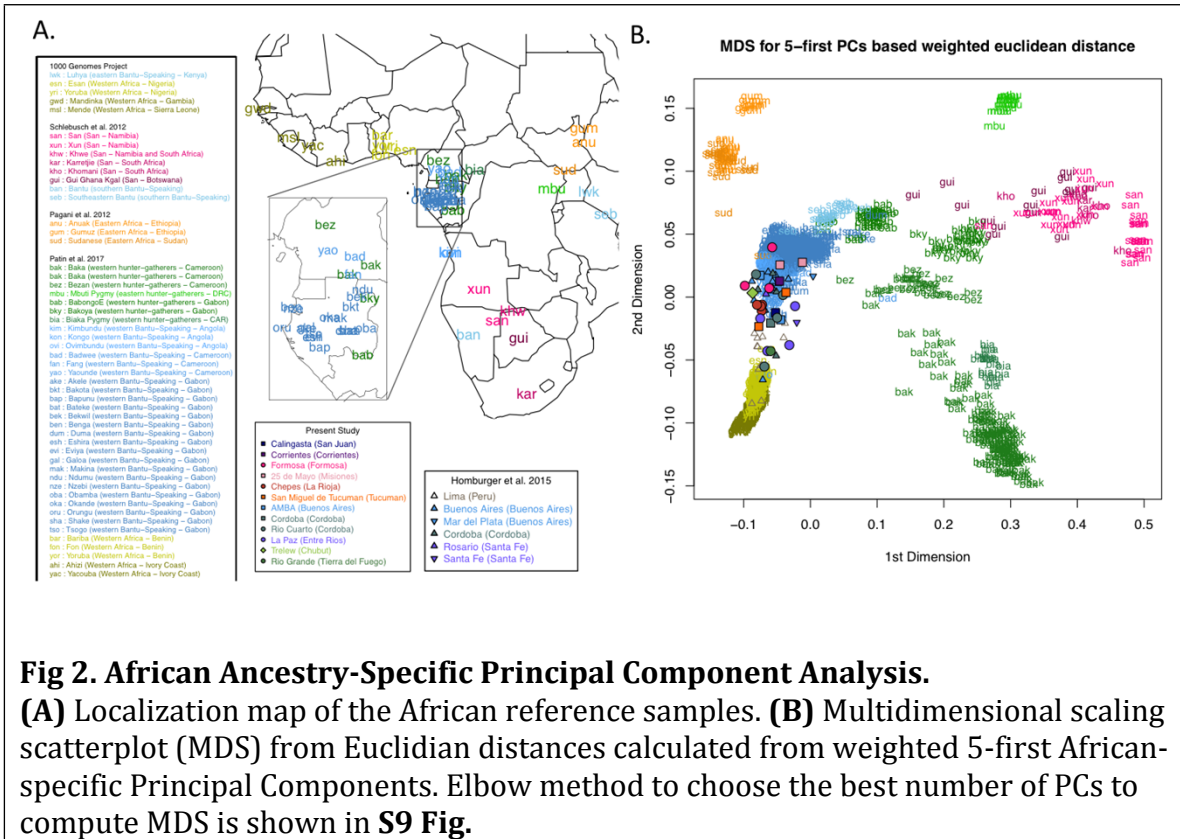

399

400 **Fig 2. African Ancestry-Specific Principal Component Analysis.**  
 401 **(A)** Localization map of the African reference samples. **(B)** Multidimensional scaling  
 402 scatterplot (MDS) from Euclidian distances calculated from weighted 5-first African-  
 403 specific Principal Components. Elbow method to choose the best number of PCs to  
 404 compute MDS is shown in **S9 Fig**.

405 The PCA applied to this data allowed the distinction among those groups (**Fig 2B**).

406 The individuals from Lima (Peru) tend to group with the Western Africa  
 407 populations, consistent with historic records that account to a Western African  
 408 origin of the slaves deported to Peru through the Caribbean harbors [54]. Most of  
 409 the Argentinian individuals are within the Bantu-influenced population cluster  
 410 while others individuals are clustering with Western Africa populations. Several  
 411 other Argentinian individuals do not group within any African cluster and rather  
 412 are found between the Western Africa and Bantu-influenced clusters (**Fig 2B**).

413 These patterns were confirmed by applying Admixture algorithm. The Cross-

414 Validation procedure points to a best fit of the data with  $K=5$  (**S10A Fig**). With five  
415 ancestral populations, African individuals cluster in a similar fashion as observed in  
416 the PCA. The Bantu-influenced and Western Africa components are the most  
417 represented in Argentinean individuals. Moreover, this analysis also showed that  
418 some individuals exhibit smaller proportions of Eastern Africa component,  
419 particularly in Northern Argentina, as well as Western Hunter-Gatherer ancestry  
420 (**Fig 3**).

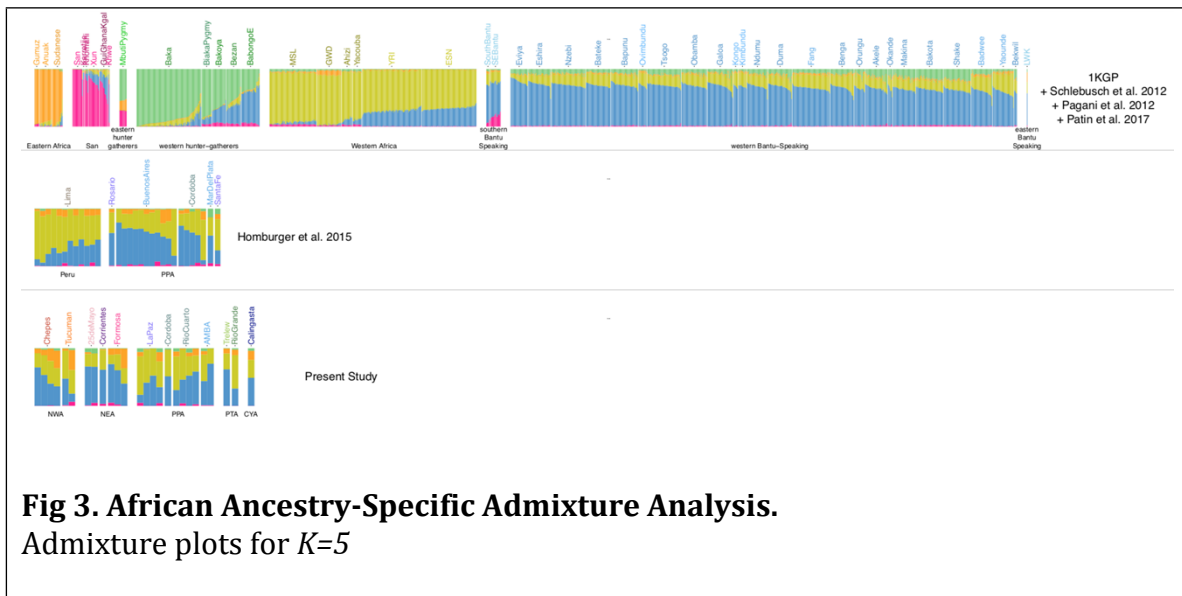

424 The legacy of Western Africa on the African genetic diversity in the Americas has  
425 been preeminent [55–57], along with an impact of Bantu-influenced populations  
426 from Central Western Africa, particularly in Brazil South and the Caribbean [55,56].  
427 These two African ancestries have also been previously documented in Argentina  
428 from studies of autosomal [34] and maternal markers [58,59]. Maternal lineages  
429 specific to populations from Central Western Africa – particularly from Angola - are  
430 the most common African lineages in Argentina according to studies in the Central  
431 region [58] and in four urban centers (Puerto Madryn, Rosario, Resistencia and

432 Salta) [59]. These results are concordant with the predominance of the Bantu-  
433 influenced origin identified in the present study from autosomal markers. In  
434 addition, the presence of Southeastern Africa maternal lineages in Argentina [58,59]  
435 is consistent with African ancestry of this origin identified here. Additional analyses  
436 with larger number of individuals and higher SNP density for autosomal are  
437 required to follow-up these results.

#### 438 **4.2.4 Native American ancestry components in Argentina**

439 We compared masked genotype data for admixed individuals with masked genotype  
440 data of Native American reference populations from South America [37,38] and a set  
441 of ancient DNA data for samples in the region [35–37,60,61] (**DS6; Fig 4A**). The PCA  
442 using modern individuals, and projecting the ancient samples, confirmed the three  
443 main South Native American clusters described by de la Fuente *et al.* (2018) (**Fig**  
444 **4B**). Namely, we can distinguish between the three clusters already mentioned in  
445 the analyses at the global level: CAN, CCP and LWL. The admixed individuals from  
446 Lima are mainly located within CAN, while those from Santiago de Chile are found  
447 next to CCP. As for the Argentinean admixed individuals, some are located within  
448 one of the three clusters while many others are located in-between.

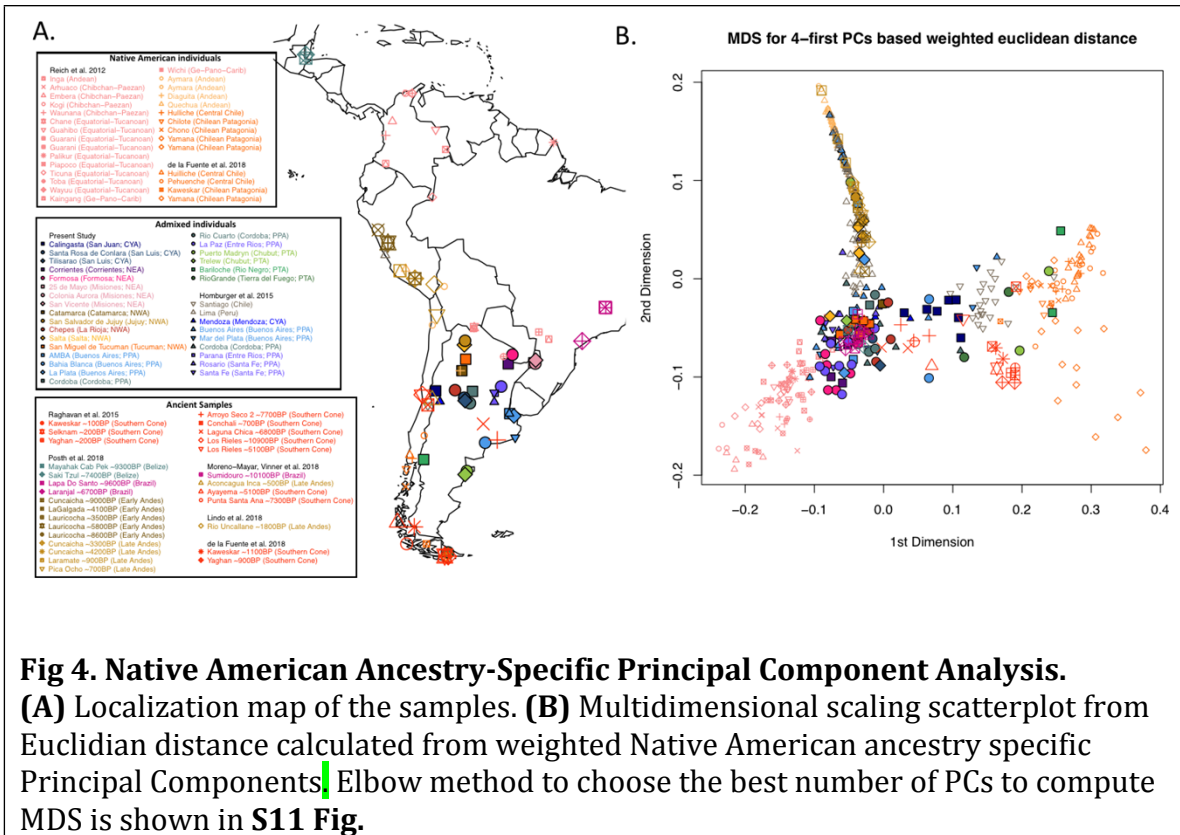

449

**Fig 4. Native American Ancestry-Specific Principal Component Analysis.**  
**(A)** Localization map of the samples. **(B)** Multidimensional scaling scatterplot from  
 Euclidian distance calculated from weighted Native American ancestry specific  
 Principal Components. Elbow method to choose the best number of PCs to compute  
 MDS is shown in **S11 Fig**.

455 Similar results were also observed when applying Admixture algorithm. The Cross-  
 456 Validation procedure points to a best fit of the data with  $K=3$  (**S12A Fig**). The  
 457 proportion estimates for the three main Native American ancestries observed for  
 458 the South America Native American individuals and for the ancient samples are  
 459 consistent with CAN, CCP and LWL labels that we attributed for the interpretation of  
 460 the PCA (**Fig 5**). Concerning the admixed individuals, CCP ancestry is the most  
 461 represented in Santiago de Chile, while CAN ancestry prevails in Lima, Peru (**Fig 5**).  
 462 In Argentina, the three Native American ancestries are observed in almost all the  
 463 admixed individuals studied. In Northeastern Argentina (NEA), LWL ancestry is the  
 464 most frequent. In Northwestern Argentina (NWA), CAN ancestry is not clearly  
 465 dominating since LWL is also observed in important proportions. In the South, CCP  
 466 is observed in greater proportions. However, two individuals sampled in Trelew and

467 Puerto Madryn, next to the Atlantic coast of Patagonia, exhibit greater proportions  
 468 of LWL and CAN, respectively (**Fig 5**). The reduced genealogical information for the  
 469 individual from Trelew does not inform about his Native American ancestors. On the  
 470 other hand genealogical information of the individual from Puerto Madryn attests to  
 471 a recent migration to this locality since he was born in Jujuy province (NWA), as well  
 472 as her both parents and paternal grandparents while maternal grandparents were  
 473 born in Bolivia. This particular case is a perfect example of recent migrations to the  
 474 Patagonia region [15], and more generally within or to Argentina [62].

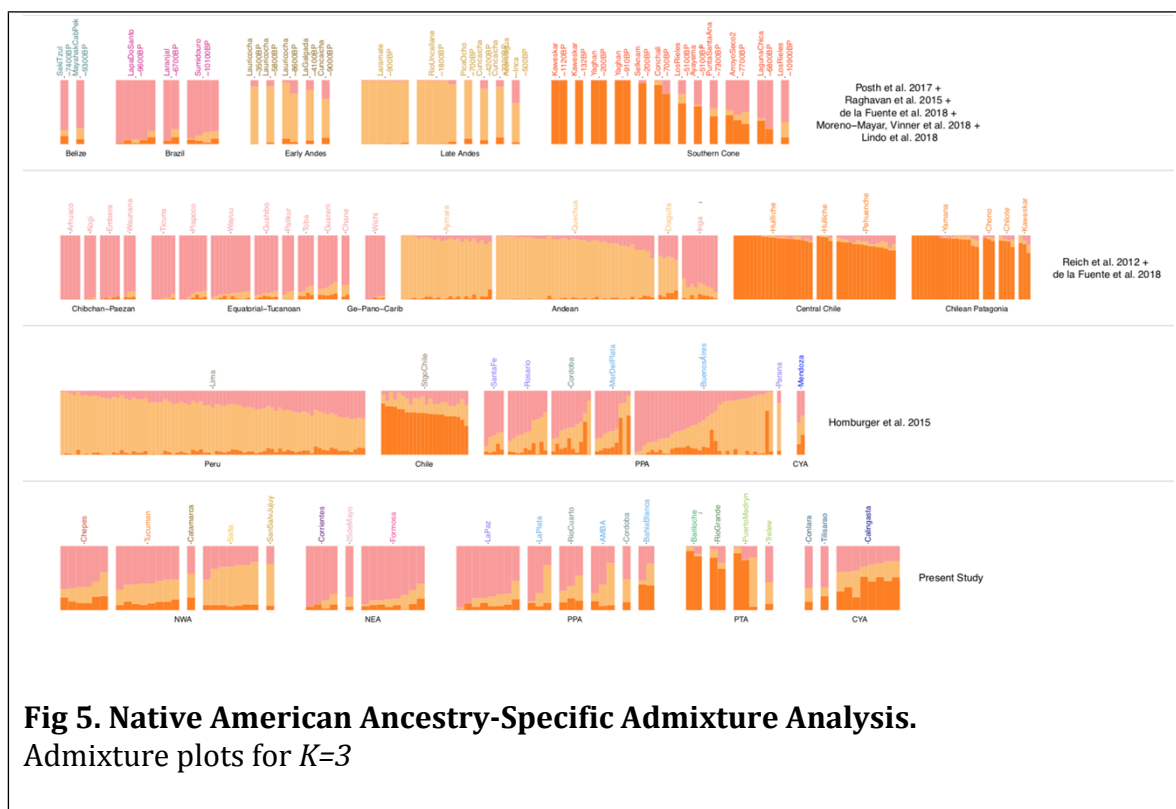

478 Although migration events tend to reduce the genetic distance among these  
 479 components, we still identified correlations between geographical coordinates and  
 480 the proportions of each Native American ancestry component. Indeed, the  
 481 proportion of CAN and LWL is higher further North (**S13A-B Fig**) while the

482 proportion of CCP is higher further South (**S13C Fig**). In addition, the proportion of  
483 CAN is higher further West (**S13D Fig**) while the proportion of LWL is higher  
484 further East (**S13E Fig**). This association between Native American ancestry  
485 proportions and geography is expected under a model of ancient divergence and  
486 genetic drift.

487 Note that a model with  $K=3$  at the South American scale with masked data is  
488 consistent with the results from Admixture at a global scale with unmasked data for  
489 which the best model contains 3 putative ancestral populations specific to South  
490 American (**S2 Fig**). Moreover, the proportions for each of the three Native American  
491 components estimated from masked data highly correlate with estimates from  
492 unmasked data (**S14 Fig**).

493 Many individuals from the Cuyo and Pampean regions of Argentina (San Juan and  
494 Córdoba provinces as well as Southern of Buenos Aires province) exhibit a complex  
495 Native American ancestry in both the Principal Component (**Fig 4**) and Admixture  
496 analyses (**Fig 5**). This pattern of intermediate position in the PCA graph and with  
497 mid proportions of different ancestries in Admixture analyses can be interpreted as  
498 the result of a mixture between the ancestries depicted. Alternatively, it can reflect  
499 genetic diversity underrepresented by these ancestries because of relative limited  
500 shared history with them. Increasing the number of ancestral populations to 4 in the  
501 Admixture analyses, we observed that CCP component is actually structured and  
502 that modern individuals from Argentinean Patagonia exhibit mainly a Central Chile  
503 ancestry instead of a Patagonian ancestry ( $K=4$ ; **S12C Fig**). With an additional

504 ancestral population in the model, we identified a component specific to the Middle  
505 Holocene samples from the Southern Cone and Brazil ( $K=5$ ; **S12D Fig**).

506 In order to analyze further the evolutionary history of the Native American ancestry,  
507 we assigned the 452 modern South American individuals (the 53 ancient samples  
508 included in **DS6** were not analyzed here) to a Native American ancestry cluster  
509 using an objective quantitative approach based on  $K$ -means clustering (**S15 Fig**; see  
510 Material and Methods for details). Thus, we assigned 163, 161 and 70 individuals to  
511 the clusters representing CAN, LWL and CCP, respectively. 32 individuals were  
512 assigned to a fourth cluster. The remaining 26 individuals were removed for further  
513 analyses because their group assignment was not consistent across the three  
514 clustering approaches. **S4 Table** describes the cluster assignment for the studied  
515 individuals. We acknowledge that these groups are culturally, ethnically and  
516 linguistically heterogeneous. However, we argue that analyzing such groups built  
517 from genetic similarities may provide interesting insights at a broad scale into  
518 evolutionary mechanisms that shaped the Native American ancestry in South  
519 America.

#### 520 **4.2.5 Relationship among the four identified Native American components**

521 We ran  $f_3(\textit{Target}; S1, S2)$  to test whether *Target*,  $S1$  and  $S2$  are related in a form of a  
522 tree (positive  $f_3$  expected) or whether *Target* is the result of admixture between  $S1$   
523 and  $S2$  (negative  $f_3$  expected). Significant  $f_3$  positive scores were obtained for all the  
524 possible comparisons among the four Native American clusters identified (**Fig 6A**;  
525 **S5A Table**). In addition to confirming the differentiation among the three



526 components labeled geographically, this analysis showed that the fourth group most  
527 likely represents a Native American component on its own never described in any  
528 previous study of autosomal genetic markers. Actually, the distribution of  $1 - f_3(YRI;$   
529  $Ind1, Ind2)$  between pairs of individuals from different groups (**S16 Fig**) does not  
530 suggest a mixture among the 3 geographically labeled components to explain why  
531 individuals from the fourth group are located at intermediate positions in the PCA  
532 and exhibit mid Admixture proportion estimates (as shown in **Fig 4** and **Fig 5**).

533 We estimated  $f_4(YRI, Target; S1, S2)$  to test whether a component (*Target*) shares  
534 more affinity with any of the other two components (*S1* and *S2*). We observed that  
535 (i) CAN has no particular genetic affinity with any component relative to the others;  
536 (ii) LWL is closer to CAN as compared to CCP and the fourth component; and (iii) the  
537 fourth component and CCP exhibit higher genetic affinity between them than with  
538 CAN or LWL (**Fig 6B; S5B Table**). However, a neighbor-joining analysis [63] from  
539 distances of the form  $1/f_3(YRI; X, Y)$  suggests that CAN is more closely related to CCP  
540 and the fourth component than to LWL (**Fig 6C; S5C Table**).

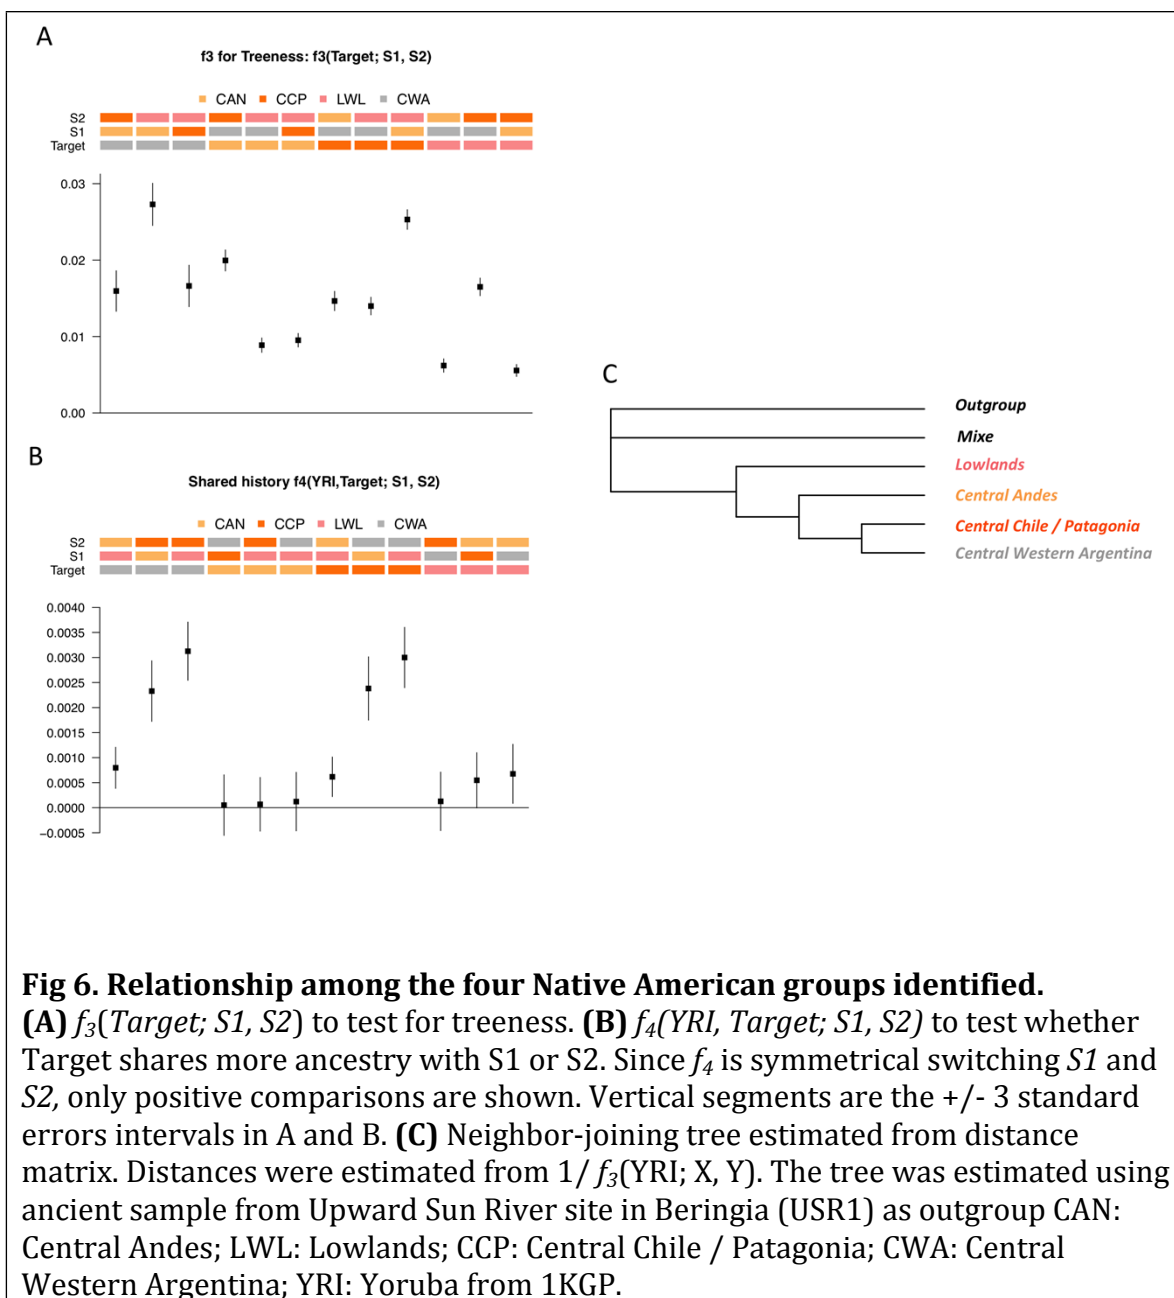

541

542 **Fig 6. Relationship among the four Native American groups identified.**

543 **(A)**  $f_3(\text{Target}; S1, S2)$  to test for treeness. **(B)**  $f_4(\text{YRI}, \text{Target}; S1, S2)$  to test whether  
 544 Target shares more ancestry with S1 or S2. Since  $f_4$  is symmetrical switching S1 and  
 545 S2, only positive comparisons are shown. Vertical segments are the +/- 3 standard  
 546 errors intervals in A and B. **(C)** Neighbor-joining tree estimated from distance  
 547 matrix. Distances were estimated from  $1/f_3(\text{YRI}; X, Y)$ . The tree was estimated using  
 548 ancient sample from Upward Sun River site in Beringia (USR1) as outgroup CAN:  
 549 Central Andes; LWL: Lowlands; CCP: Central Chile / Patagonia; CWA: Central  
 550 Western Argentina; YRI: Yoruba from 1KGP.

551 Seven out of eight individuals from Calingasta, a locality in the San Juan province  
 552 and located in the Northwest Monte and Thistle of the Prepuna ecoregion, were  
 553 assigned to the fourth cluster (the only remaining individual from this locality is not  
 554 consistently assigned to a cluster and has been removed). Moreover, out of 18  
 555 individuals from Santiago de Chile assigned to any given cluster, 16 have also been  
 556 assigned to the fourth component. The genealogical record for the studied

557 Calingasta individuals attests to a local origin of their direct ancestors up to two  
558 generations ago and their region-specific maternal lineages (**S1 Table**; [64]).  
559 Moreover, all the Huilliche and Pehuenche individuals from Central Chile [37] have  
560 been consistently assigned to CCP. Altogether, we argue that this fourth component  
561 may represent a Native American ancestry that diverged from CCP and established  
562 on the Eastern side of the Andes in Cuyo region. It may have extended its influence  
563 to the Pampas and Argentinean Patagonia region as suggested by the assignation to  
564 this cluster of individuals from the provinces of Mendoza, Córdoba Capital, Buenos  
565 Aires and Tierra del Fuego (**S15 Fig; S4 Table**).

566 The existence of a specific differentiated component in the Central Western and  
567 Central regions of Argentina has been previously suggested from mitochondrial  
568 analyses accounting to the genetic relationship between these two regions [11] and  
569 the presence of specific clades underrepresented elsewhere [11,58,65]. These  
570 studies support the hypothesis of a common origin and/or important gene flow  
571 [66], and the authors referred to a meta-population with great temporal depth and  
572 differentiated from other regions in Argentina. Moreover, the ethnographic  
573 description of the populations that were settled at the moment of contact with the  
574 Spanish colonies accounts to a potential relationship between Huarpes in the Cuyo  
575 region and Comechingones in present-day Córdoba province ([67], cited by [68]).  
576 Thus, we suggest labeling as Central Western Argentina (**CWA**) this fourth Native  
577 American component never described before from autosomal markers.

578 Moreover, different, perhaps complementary, historical facts may explain the  
579 representation of this component in Santiago de Chile and its absence in Huilliche

580 and Pehuenche populations. First, in pre-Colombian times, Central Andean  
581 civilizations may never have reached Southern latitudes than the Biobío River.  
582 Indeed, the troops of the Inca Empire, the Central Andean civilization that reached  
583 the highest latitudes, apparently never crossed that river [69,70], leaving Huilliche  
584 and Pehuenche territories, among others, outreach the expansion of any Central  
585 Andean civilization [69]. Second, during colonial times, the Spanish colonies could  
586 not settle South of the Biobío River neither, and they organized massive deportation  
587 of Huarpes individuals from Cuyo region to palliate the lack of indigenous workforce  
588 [71]. For example, in Santiago de Chile, in 1614, 37% of the indigenous people that  
589 lived in the suburbs were Huarpes according to the chronicler Vázquez de Espinosa  
590 [72].

591 The present study, in which we analyzed individuals that do not belong to any  
592 indigenous community, made possible the identification of a Native American  
593 component never described previously from autosomal markers. This demonstrates  
594 the importance of broadening studies beyond the indigenous communities in order  
595 to reduce the underrepresentation of many regions in Argentina, and thus, to reach  
596 a better characterization of the Native American specific genetic diversity.

#### 597 **4.2.6 Genetic affinity of the four Native American ancestry components with** 598 **ancient populations**

599 Pseudo-haploid genotype data were used for ancient samples published in the  
600 literature [35–37,60,61,73,74], and their genetic affinity to the four Native American  
601 ancestry components identified in Argentina was evaluated. The ancient samples

602 were classified according to their spatiotemporal distribution following Posth *et al.*  
603 2018 [35].

604 Graphical summaries of pairwise distances are available as the neighbor-joining  
605 analysis [63] from  $1/f_3(YRI; X, Y)$  distances (**S17A Fig**) and a Multidimensional  
606 scaling analyses from  $1-f_3(YRI; X, Y)$  distances (**S17B Fig**).

607 When comparing the genetic affinity of a given component with the different ancient  
608 groups using either the  $f_3$ -outgroup or the  $f_4$  statistics (**S18 Fig; S5D,E Tables**), we  
609 identified that CAN tends to exhibit greater genetic affinity with ancient Andean  
610 populations than with other ancient groups (**S18A,E Figs**). Strikingly, the genetic  
611 affinity of this component with both Late Andes and Early Andes ancient groups  
612 would point to a genetic continuity across the whole temporal transect that the  
613 archaeological samples provide. This would suppose that the replacement of an  
614 early population arrival by a later stream of gene flow in Central Andes identified  
615 previously [35] does not fully explain the current-day genetic diversity for CAN. For  
616 CCP, we observed higher genetic affinity with ancient Southern Cone groups  
617 (**S18C,G Figs**). Overall CWA appears to be closer to ancient Southern Cone groups,  
618 particularly with Conchalí ~ 700BP, although its genetic affinity with some Andean  
619 groups (La Galgada ~4100 BP, Pica Ocho ~700 BP and Aconcagua ~500 BP) is  
620 relatively important (**S18D,H Figs**). As for LWL, we observed intermediate genetic  
621 affinity with ancient samples from both the Andes and the Southern Cone (**S18B,F**  
622 **Figs**). Indeed, the three ancient samples with the greatest genetic affinity with  
623 Lowlands components are from the Andes (La Galgada ~4100 BP, Aconcagua ~500  
624 BP, and Pica Ocho ~700 BP), followed by three ancient groups in the Southern Cone

625 (Conchalí ~700 BP, Yaghan ~ 200 BP, and Selk'nam ~200 BP). The fact that there is  
626 no ancient sample group exhibiting outstanding genetic affinity with LWL points to  
627 the underrepresentation of this component in ancient samples. Indeed, the temporal  
628 period covered by the Brazilian ancient samples is much older than for other  
629 regions, and the geographical range restricted to Brazil does not cover the entire  
630 area where LWL currently prevails. Moreover, LWL is a heterogeneous group that  
631 includes individuals from the Gran Chaco in Argentina, the Amazonas and Northern  
632 Andes. Even so, Admixture analyses demonstrated that LWL shares more ancestry  
633 with ancient samples in Brazil (**Fig 5**).

634 To study further the history of the four modern components of Native American  
635 ancestry, we evaluated the relationship of the time depth of the ancient samples  
636 from either the Andes or the Southern Cone, with their genetic affinity to the  
637 modern components of Native American ancestry (**Fig 7**). For that purpose, we  
638 performed a linear regression between  $f_3(\text{YRI}, X, \text{Anc})$  – where  $X$  is one the four  
639 Native American component – and the age of the ancient population tested (*Ancient*  
640 in the  $f_3$  formula). We observed a significant relationship between the age of the  
641 ancient Southern Cone samples and their genetic affinity with CCP ( $P = 3.15 \times 10^{-4}$ )  
642 and CWA ( $P = 3.94 \times 10^{-2}$ ) while no significant relationship was identified for LWL  
643 and CAN ( $P = 0.523$  and  $P = 0.596$ , respectively; **Fig 7A**). These patterns could be due  
644 to a relationship between geography and the age of the ancient samples since the  
645 most recent samples are concentrated in the Southern tip of the subcontinent (**Fig**  
646 **4A**). To correct this putative confounding effect, we repeated the same analyses but  
647 using the residuals of the linear regression between the age of the ancient samples

648 and their geographic coordinates. This correction intensified the relationship  
649 described for CCP and CWA ( $P = 4.78 \times 10^{-5}$  and  $P = 2.21 \times 10^{-6}$ , respectively; **Fig 7C**). It  
650 also allowed to actually identifying significant relationships for LWL and CAN ( $P =$   
651  $8.07 \times 10^{-4}$  and  $P = 1.56 \times 10^{-3}$ , respectively). On the other hand, CAN is the only  
652 modern Native American component that exhibits a significant relationship between  
653 its genetic affinity with ancient Andean samples and their age (**Fig 7B**). This pattern  
654 holds the correction for geography (**Fig 7D**). Repeating the same analyses using  $f_4$   
655 statistics, instead of  $f_3$ -Outgroup, we reached the same conclusions regarding the  
656 relationships between the age of the ancient Andes samples or the Southern Cone  
657 ancient samples and their genetic affinity with any of the four modern Native  
658 American components (**S19 Fig**).

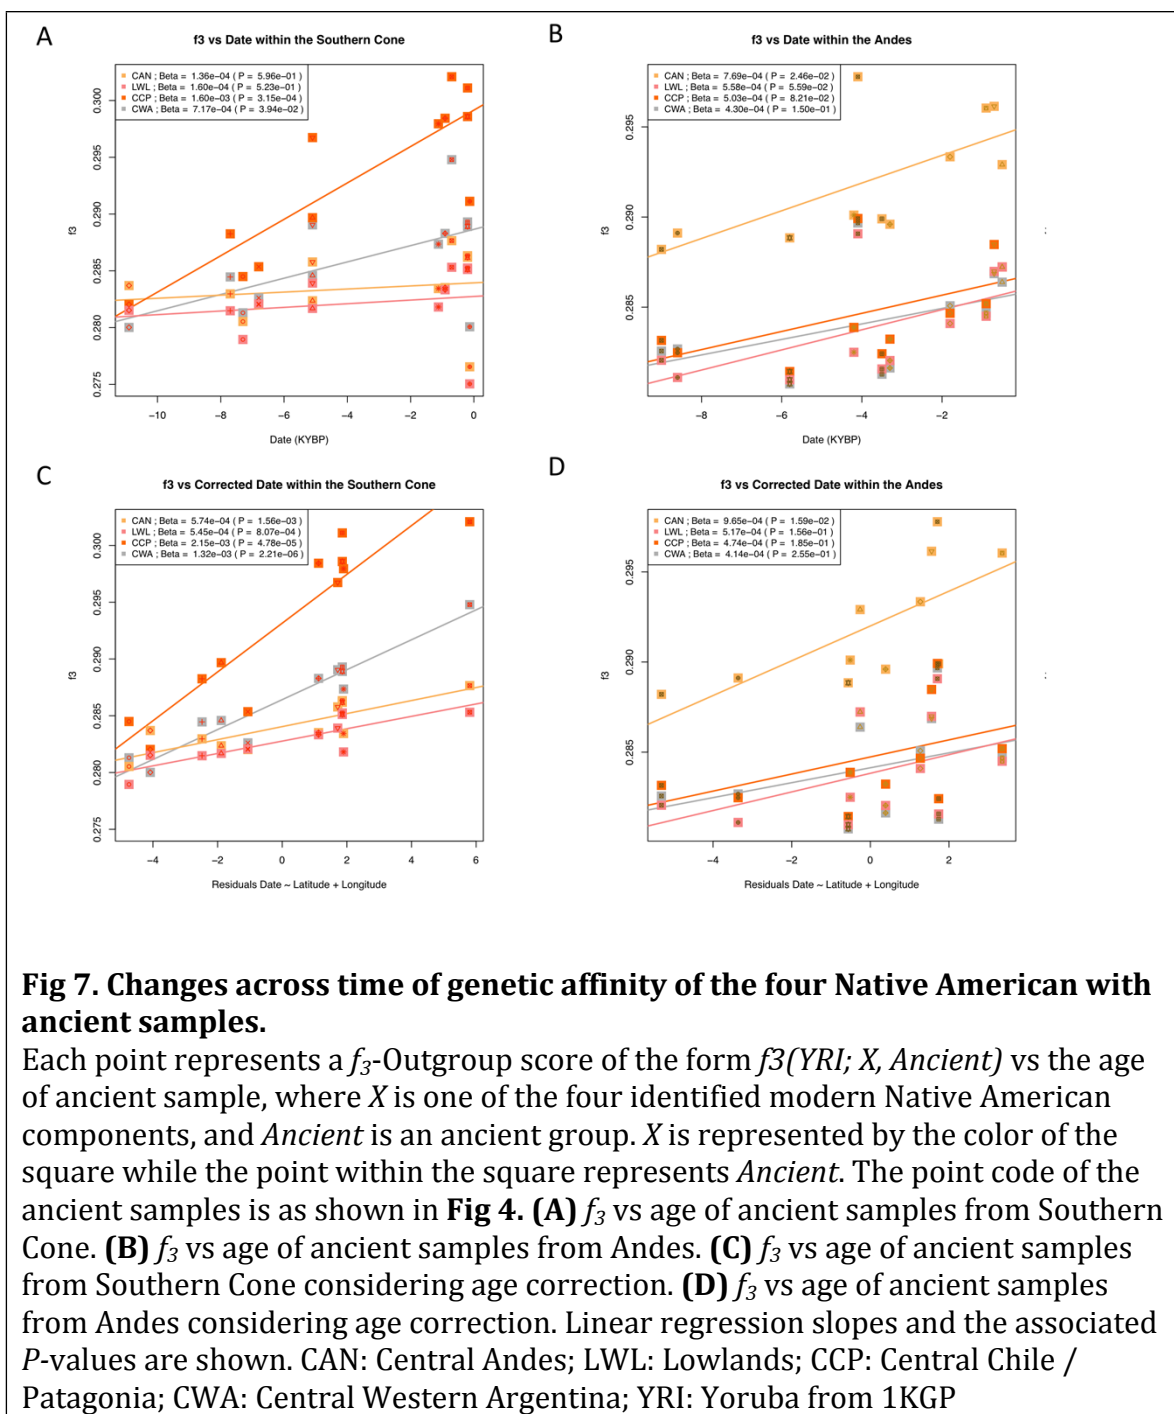

672 **4.2.7 Comparison of the shared history of two components with ancient DNA**  
673 **samples**

674 The analysis of archaeological samples gives insights into the temporal depth of the  
675 main demographic events that occurred during the evolutionary history of the



676 analyzed populations. Concerning the times of divergence of the four components  
677 discussed in this study, although it is not possible to estimate them exactly, we can  
678 establish lower and upper bounds. To explore this issue, we used another setting of  
679 the  $f_4$  statistics (**S5F Table; S20 Fig**). In this analysis, of the form  $f_4(YRI, Ancient; X,$   
680  $Y)$ , a negative result is expected if  $X$  shares more history with an *Ancient* relative to  
681  $Y$ , while a positive result is expected if  $Y$  shares history with *Ancient* relative to  $X$ . We  
682 observed that all Southern Cone ancient samples – except Los Rieles ~10900 BP  
683 which has been described as derived from an ancestry shared with the Clovis  
684 culture that has been replaced later [35]) – are more similar to CCP than to CWA  
685 (**S20F Fig**), pointing to divergence time between those two components older than  
686 ~7700 BP. CWA is not more attracted by any Brazilian and Andean ancient sample  
687 as compared to CCP, reinforcing the idea that CWA is not a mix of CCP, CAN and LWL  
688 related ancestries. Moreover, we observed that all the ancient groups of the  
689 Southern Cone (with the exception of Los Rieles ~10900 BP) have greater genetic  
690 affinity with CCP than with CAN and LWL (**S20B,D Figs**). With the exceptions of the  
691 two Middle Holocene ancient samples from Patagonia (Ayayema ~5100 BP and  
692 Punta Santa Ana ~ 7300BP) and Los Rieles ~10900 BP, ancient groups of the  
693 Southern Cone exhibit higher genetic affinity with CWA than with LWL (**S20C Fig**).  
694 In addition, the comparisons including LWL and CWA also point to a closer genetic  
695 relation between ancient groups from the Southern Cone with CWA, although  
696 significance is reached only for Late Holocene Patagonia samples.

697 All the ancient samples from the Andes, indifferently if there have been previously  
698 assigned to the Early or Late population stream [35], are genetically more similar to

699 CAN than to any of the three other components (**S20A,D,E Figs**). These results  
700 support the hypothesis that the ancestry associated with an early Andes population  
701 arrival remains present to some extent in modern Central Andes populations and  
702 has not been totally replaced by a later stream of gene flow. Although, ancient  
703 samples from Brazil does not exhibit striking differences in their genetic affinity  
704 with a modern Native American component as compared to another, it seems that  
705 they are closer to LWL than to CWA and CCP but not than to CAN (**S20A-C Figs**).  
706 Moreover, the archaeological samples in Brazil have higher genetic affinity with CAN  
707 than with CWA and CCP (not significant for the latter comparisons). This points that  
708 divergence of LWL with CCP and CWA could have occurred before than the  
709 divergence of LWL with CAN (also observed in **S17A Fig**).

710 Altogether, the trends depicted by these analyzes are expected under a model of  
711 early divergence among the four components. Our results also advocate to genetic  
712 continuity over long period of time for the different components after they  
713 differentiated.

#### 714 **4.2.8 Past influence of a component on another since their divergence**

715 In order to get insights into the past genetic influence between two components  
716 since their divergence, we applied a last  $f_4$ -statistics analysis (**S5G Table; S21 Fig**).  
717 In this analysis of the form  $f_4(\textit{Ancient}, X; Y, \textit{YRI})$ , a negative result is expected if  $Y$   
718 shares history with  $X$  relative to  $\textit{Ancient}$ , while a positive result is expected if  $Y$   
719 shares history with  $\textit{Ancient}$  relative to  $X$ . We observed that the influence of LWL into  
720 the three other components was relatively limited (**S21A,C,E Figs**). However, this

721 result suffers poor resolution due the temporal and geographical gaps in the ancient  
722 samples representing this component. The influence of CAN appears to have been  
723 more pronounced into LWL component than into CWA and CCP components  
724 (**S21B,G,I Figs**). Strikingly, Pica Ocho ~700 BP, La Galgada ~4100 BP and  
725 Aconcagua ~500 BP attract any of the four components relative to any other  
726 component (not always reaching  $|Z| > 3$ ), with the exception of comparisons  
727 including simultaneously CCP and CWA components. In other words, the relations of  
728 a given modern component with Pica Ocho ~700 BP, La Galgada ~4100 BP and  
729 Aconcagua ~500 BP are stronger than with any other modern component, except  
730 when including both CWA and CCP in the comparison. The genetic influence of these  
731 three Andes ancient groups outside the Central Andes may be related to events  
732 geographical expansions of some Andean populations at given times. Discussing this  
733 pattern further is beyond the scope of the present study.

734 The influence of CCP into LWL and CAN also appears to have been reduced, although  
735 the negative  $f_4$  with Kaweskar ~100 BP suggests gene flow between CCP and these  
736 two components in very recent times (**S21D,H Figs**).

737 The mutual influence of CCP and CWA components seems to have been important in  
738 remote times (**S21K,L Figs**). However, the available ancient samples provide much  
739 more precise information on the influence of CCP into CWA component than for the  
740 other way around. Indeed, CWA is not attracted by any ancient DNA group relative  
741 to CCP (**S21K Fig**). Although Conchalí ~700 BP exhibit higher genetic affinity with  
742 CWA among all the analyzed ancient groups (**S18D,H Figs**), it clearly attracts CCP  
743 relative to CWA (**S21L Fig**) while it does not attract CWA relative to CCP. The

744 comparisons including CCP and CWA demonstrate that the archaeological record for  
745 which genetic data has been generated does not include ancient samples  
746 representing CWA since its early divergence with CCP neither ancient samples  
747 related to the common ancestors specific to these two components.

### 748 **4.3 Conclusions**

749 We studied genetic ancestry at the sub-continental scale in Argentinean populations.  
750 First, we confirmed that European ancestry is mostly explained by Southern  
751 European origins, although we identified several individuals with Northern  
752 European ancestry. Second, we described three main components of African  
753 ancestry in Argentina. Although the Bantu-influenced and Western components are  
754 clearly the most represented, we also found that an Eastern origin can explain some  
755 of African ancestry in Argentina and represents up to ~30% of the African ancestry  
756 for some Argentinean individuals. Studying more admixed individuals in Argentina  
757 would help to get a better representation of the complex origins of African and  
758 European ancestries in the country.

759 Concerning Native American ancestry, we concluded that Argentinian populations  
760 share, in varying proportions, at least three distinct components: from the Central  
761 Andes, from Central Chile/Patagonia and from the Lowlands. These components  
762 correlate with geographic coordinates. Moreover, we present here some arguments  
763 that the Native American ancestry in the Central Western region of Argentina may  
764 actually derive from a fourth component that diverged early from the other Native  
765 American components, and it maintained a tight link with the Central

766 Chile/Patagonia component. This relation is not explained by a putative  
767 contribution of admixed individuals from Santiago de Chile (**S22 Fig**). Having  
768 identified this component from admixed individuals demonstrates that to  
769 characterize the Native American genetic diversity focusing only on indigenous  
770 communities is insufficient, at least in Argentina.

771 It is important to acknowledge that our results should be taken cautiously since  
772 studying admixed individuals make the analyses more complex. Leveraging a pure  
773 statistical approach, we grouped individuals from rather culturally, ethnically and  
774 linguistically heterogeneous groups to represent the four Native American  
775 components discussed here. These groups exhibit within population structure, and  
776 gene flow are most likely to have occurred among them after divergence. In  
777 addition, temporal and geographical gaps in the archaeological samples analyzed,  
778 particularly for the Central Western Argentina and Lowlands components, limits the  
779 interpretative resolution of our analyses. Yet, the present study provides useful  
780 insights into the routes followed by the main populations arrivals in the Southern  
781 Cone (**S23 Fig**).

782 Further efforts are needed to better characterize the Native American ancestry  
783 component identified in the Central Western region of Argentina. Particularly we  
784 encourage future studies to confirm the tentative geographical label that we suggest  
785 here, and to estimate its influence in the region. Besides these specific questions,  
786 many other general questions remain to be answered to better understand the pre-  
787 Colombian population dynamics in the Southern Cone such as the time and place of  
788 the splits among the components described here, and the extent of genetic

789 exchanges among them. More genotype data for ancient samples, modern  
790 indigenous communities and admixed individuals, particularly in Central,  
791 Northeastern and Patagonia regions of Argentina, would help to decipher these  
792 issues.

793 The genomic characterization of populations is an unavoidable practice for many  
794 issues ranging from the understanding of our biological heritage, the rational use of  
795 biobanks, the definition of an adequate reference genome, the estimation of  
796 polygenic risk scores, the study and treatment of simple and complex diseases, and  
797 the design of a national program of genomic medicine in our country. This study is a  
798 common effort of exclusively Argentinean laboratories and totally financed by the  
799 national scientific system. It is the first step of the *Consortio PoblAR*, a national  
800 consortium for the creation of a public reference biobank to support biomedical  
801 genomic research in the Republic of Argentina [75]. Genomic knowledge of local  
802 populations should be a priority of developing countries for unbiased  
803 representation of public databases and the scientific development of our countries.

## 804 **5 Material and Methods**

805 We genotyped 94 individuals with the Axiom LAT1 array (Affymetrix ) from 24  
806 localities and 17 provinces across Argentina (**Fig 1**). These samples were selected  
807 among 240 collected by different population genetics groups (*Consortio PoblAR*) in  
808 the country. Besides ensuring an extended geographical range, inclusion criteria  
809 were: (i) sufficient DNA concentration; (ii) Native American maternal lineage; (iii)

810 Native American paternal lineage (for males when available). All saliva and blood  
811 samples have been collected with informed consent for research use, and we  
812 dispose of the necessary approvals from different ethical committees in Argentina.  
813 87 samples and 791,543 autosomal variants passed the standard Affymetrix  
814 genotyping Quality Controls (**S1 Table**).

815 Most of the genotype data processing was performed using in-house scripts in R  
816 [76] and perl [77], leveraging *plink2* [78], *vcftools v1.13* [79], and *bedTools v2* [80].

817 We compiled the genotype data for the 87 Argentinean samples with different  
818 genotype data available in the literature. We focused our study on biallelic SNPs  
819 (removing indels and SNPs with more than 2 alleles). Any putative inconsistent  
820 strand had been fixed processing to the relevant flip, filtering out any SNP with  
821 ambiguous genotype (A/T, G/C).

822 Cryptic relatedness among samples were assessed using King software [81]. To  
823 avoid any 1<sup>st</sup> degree relationship, we filtered out individuals, minimizing the total  
824 number of removals. No admixed individuals had been removed at this step.

825 In order to search for the fine-scale genetic structure of Argentinean we used  
826 different data through this work. **S2 Table** depicts the main dataset arrangements  
827 (named **DS<n>**).

## 828 **5.1 Argentinean genetic diversity within a worldwide context**

829 To analyze genetic diversity in Argentina within a worldwide context, we built the  
830 Dataset1 (**DS1**). This dataset contains 87 Argentinean samples, 654 African, 503

831 European and 347 American samples from 1KGP [45], 54 modern unrelated Chilean  
832 samples [37], and 161 Native-American individuals from South America [38].  
833 Moreover, **DS1** included genotype data from [33] which consists in 82 individuals  
834 from Lima (Peru), 27 from Santiago de Chile, and 161 from Argentinean urban  
835 centers.

836 We filtered out any variant and individual exhibiting in the compiled data set more  
837 than 2% and 5% of missing genotypes (--geno 0.02 and --mind 0.05 flags in plink  
838 1.9), respectively, as well as Minor Allele Frequency below 1% (--maf 0.01 flag in  
839 plink 1.9). The filtered data was then pruned for Linkage-Disequilibrium (--indep-  
840 pairwise 50 5 0.5 option in plink 1.9). The combined data set have a total  
841 intersection of 59,237 SNPs and 2,076 individuals. With this curated data we  
842 performed Principal Component Analyses [44] and Admixture [46] (**S1 and S2**  
843 **Figs**).

## 844 **5.2 Local Ancestry**

845 Local ancestry analyses rely on haplotype reconstruction (phasing) and require high  
846 SNP density. Since, admixed individuals of interest were genotyped on different  
847 microarray platforms, we decided to perform two separate local ancestry analyses  
848 on two different data sets (**DS2** and **DS3**). **DS2** consists of 87 Argentinean  
849 individuals from the present study, and 54 Chilean individuals [37], all of them  
850 genotyped with the Axiom LAT1 microarray. **DS3** includes 175 Argentinean, 27  
851 Chilean, and 119 Peruvian genotyped with the Illumina OMNI1 microarray [33].  
852 Both **DS2**, **DS3** were merged with 1KGP data consisting in 503 phased reference



853 samples for each of the African and European genetic ancestry, and 347 Latin  
854 American individuals.

855 The 87 Argentinean, and the 54 Chilean samples were phased with shapeIT2  
856 [82,83]. The genetic map, and 5,008 haplotypes panel provided by 1KGP were  
857 downloaded from [http://mathgen.stats.ox.ac.uk/impute/1000GP\\_Phase3/](http://mathgen.stats.ox.ac.uk/impute/1000GP_Phase3/).  
858 Algorithm, and model parameters were used by default, filtering out monomorphic  
859 SNPs, and those with more than 2% of missing genotype. We obtained phased  
860 genotype data for 608,501 autosomal SNPs. This data was then merged with phased  
861 1KGP genotype data for African, American and European samples described before.  
862 Since this data set derived from DS2, we call it **DS2p** (phased DS2).

863 The 175 Argentinean, 27 Chilean and 119 Peruvian samples from [33] were phased  
864 separately using the same procedure with shapeIT2. After filtering for missing  
865 genotypes and merging with phased 1KGP genotype data for African, American and  
866 European samples we obtained phased data for 694,626 autosomal SNPs. Since this  
867 data set derived from DS3, we call it **DS3p** (phased DS3).

868 In **DS2** and **DS3** we ran Admixture using K parameter minimizing the Cross-  
869 Validation score. We used individuals with more than 99% of Native American  
870 ancestry as references for local ancestry estimation. For **DS2** we used  $K = 7$ , and  
871 Native American ancestry was defined as the sum of the two American specific  
872 components observed (**S24 Fig**). According to this criterion, 48 individuals were  
873 assigned as Native American reference: 20 PEL, 2 MXL, 23 Chilean from [37] (1  
874 Huilliche, 9 Kaweskar, and 13 Pehuenche), and 3 Argentinean – 1 from the

875 Metropolitan Area of Buenos Aires (AMBA), 1 from San Salvador de Jujuy, and 1  
876 from Salta). All the other American samples were defined as Admixed.

877 For **DS3**, we used  $K = 5$ , and Native American ancestry was defined as the single  
878 American specific component observed (**S25 Fig**). According to this criterion, 19  
879 individuals were assigned as Native American reference: 10 PEL, 5 from Lima, 1  
880 from Santiago de Chile, and 3 Argentineans from Buenos Aires. All the other  
881 American samples were defined as Admixed.

882 RFMix v2 ([47] downloaded at <https://github.com/slowkoni/rfmix> on 15th August  
883 2018) was run on **DS2P** and **DS3P** separately using parameter settings similar to  
884 [84]. The reference panels consist of the African and European samples from 1KGP,  
885 as well as Native American individuals identified through Admixture procedure  
886 described before. We used 1 Expectation-Maximization iteration (-e 1) using the  
887 reference panels in this process (--reanalyze-reference). We used CRF spacing size  
888 and random forest window size of 0.2 cM (-c 0.2 and -r 0.2). We use a node size of 5  
889 (-n 5). We set the number of generations since admixture to 11 (-G 11) considering  
890 the estimates from [33]. The forward-backward output was then interpreted to  
891 assign allele ancestry to the one exhibiting major posterior probability, conditioning  
892 that it was greater than 0.9. Otherwise, the allele ancestry was assigned to Unknown  
893 (UKN). The global ancestry proportions estimated by this RFMix analysis were  
894 compared with those obtained with Admixture software. The global ancestry  
895 proportion estimates obtained by both procedures matched: spearman's correlation  
896 greater than 0.9 in American samples for any of the 3 continental ancestries (**S5**

897 **Fig).**

### 898 **5.3 Ancestry Specific Population Structure**

899 In order to analyze the ancestry-specific population structure we masked the data,  
900 i.e. for each individual, we assigned missing genotype for any position for which at  
901 least one of the two alleles was not assigned to the relevant ancestry. In other  
902 words, to study ancestry A, we kept for each individual, regions exhibiting ancestry  
903 A on both haplotypes (ditypes) as illustrated in **S6 Fig**.

#### 904 **5.3.1 European ancestry specific population structure**

905 To study European ancestry specific population structure, we analyzed together  
906 masked data for this ancestry for individuals from **DS2P** and **DS3P** excluding  
907 individuals from Chilean Native American communities [37]. This data was merged  
908 with a set of reference individuals with European ancestry [49], which is a subset of  
909 the POPRES dataset [48]. We call this data set as **DS4**. We removed individuals with  
910 less than 30% SNPs with the ancestry ditypes (--mind 0.7 with *plink* 1.9). We also  
911 removed SNPs with more than 50% of missing genotypes (--geno 0.5 with *plink* 1.9).  
912 Thus, **DS4** contains 147 modern Argentinean individuals (71 from the present study  
913 and 76 from [33]), 4 individuals from Santiago de Chile, 1 from Lima. **DS4**  
914 encompasses 60,968 SNPs of which 54,073 remained after LD-pruning (--indep-  
915 pairwise 50 5 0.5 flag in *plink2*).  
916 *Smartpca* from Eigensoft v7.2.0 run on **DS4** [44] with the *lsqproject* option ON. We  
917 report the PCA results summarized into a 2-dimensional space by applying

918 Multidimensional Scaling on weighted Euclidian distance matrix for the first N PCs.  
919 We weighted each PC by the proportion of variance it explains. We selected the N  
920 most informative PCs according to the Elbow method on the proportion of explained  
921 variance.

922 Admixture [46] run with  $K$  ranging from 2 to 10 with cross-validation procedure.

### 923 **5.3.2 African ancestry specific population structure**

924 To study African ancestry specific population structure, we analyzed together  
925 masked data for this ancestry for individuals from **DS2P** and **DS3P**. This data was  
926 merged with a compilation of reference individuals with African ancestry from  
927 [45,51–53]. We removed African individuals with less than 99% of African ancestry  
928 when comparing them to the 2504 individuals from 1KGP (with  $K=7$  minimizing  
929 cross-validation score; results not shown). We thus reduced the African reference to  
930 1685 individuals. We call as **DS5** the data set containing both the masked data for  
931 admixed South American individuals and African reference individuals.

932 We removed SNPs with more than 10% of missing genotypes (--geno 0.1 with *plink*  
933 1.9), and individuals with less than 5% of the ancestry ditypes (--mind 0.95 with  
934 *plink* 1.9). Thus, **DS5** contains, 26 modern Argentinean individuals (all from the  
935 present study), and 12 individuals from Lima (9). **DS5** consisted in 137,136 SNPs, of  
936 which 128,086 remained after LD-pruning (--indep-pairwise 50 5 0.5 flag in *plink2*).

937 PCA and Admixture following as for European ancestry specific population structure  
938 analyses (described before).

### 939 5.3.3 Native American ancestry specific population structure

940 To study Native American ancestry specific population structure, we analyzed  
941 together masked data for this ancestry for individuals from **DS2P** and **DS3P**. This  
942 data was merged with pseudo-haploid data for ancient samples within South and  
943 Central America [35–37,60,61], as well as with masked data for Native American  
944 individuals from [38]. The pseudo-haploid data for ancient samples was  
945 downloaded from the Reich Laboratory webpage  
946 ([https://reich.hms.harvard.edu/downloadable-genotypes-present-day-and-ancient-](https://reich.hms.harvard.edu/downloadable-genotypes-present-day-and-ancient-dna-data-compiled-published-papers)  
947 [dna-data-compiled-published-papers](https://reich.hms.harvard.edu/downloadable-genotypes-present-day-and-ancient-dna-data-compiled-published-papers)) the 15<sup>th</sup> of May 2019. For each sample, we  
948 used annotations (geographical coordinates and approximate date) from the  
949 metafile provided at the same url.

950 We call this data set **DS6**. We removed individuals with less than 30% SNPs with the  
951 ancestry ditypes (--mind 0.7 with *plink* 1.9). We also removed SNPs with less than  
952 50% individuals with the ancestry ditypes (--geno 0.5 with *plink* 1.9). **DS6** contains  
953 146 modern Argentinean individuals (74 from the present study and 72 from [33]),  
954 22 individuals from Santiago and 77 from Lima, along with 207 Native South  
955 American individuals from [37,38] and 53 ancient samples. **DS6** encompasses  
956 47,003 SNPs, of which 39,423 remained after LD-pruning (--indep-pairwise 50 5 0.5  
957 flag in *plink2*).

958 PCA and Admixture following as for European ancestry specific population structure  
959 analyses (described before), with the difference that the *poplistname* option was set

960 for *smartpca* in order to estimate the PC using only modern samples and project the  
961 ancient samples.

#### 962 **5.3.4 Statistical assignation of modern South American individuals to Native** 963 **American components**

964 Given a distance matrix among modern individuals from **DS6**, we performed *K-*  
965 *means* clustering with the number of clusters ranging from 2 to 20 and selected the  
966 *K-means* output minimizing the Bayesian Information Criterion (BIC). This  
967 procedure was applied to three different distance matrix: (i) Weighted Euclidean  
968 distance based on the two first PCs from Principal Component Analysis (ii)  
969 Euclidean distance based on the ancestry proportions estimated from Admixture  
970 ( $K=3$ ) and (iii)  $1 - f_3(Ind1, Ind2, Yoruba)$ , where *Ind1* and *Ind2* are two individuals. In  
971 the three cases, the *K-means* procedure minimized the BIC when considering 4  
972 clusters, and the clusters tend to correspond to the three Native American  
973 Component discussed in this paper (Central Chile/Patagonia, Lowlands, Andes)  
974 along with one laying in-between, and which we finally attributed to Central  
975 Western Argentina. However, individual assignment to one of these four clusters  
976 was not totally consistent according to the distance matrix we used. To obtain a  
977 robust assignation, an individual was assigned to a given cluster when it  
978 consistently belonged to it across the three *K-means* procedures (**S15 Fig**),  
979 otherwise it had been removed for following analyses. The cluster assignation for  
980 each individual is given in **S4 Table**.

981        **5.3.5 F-statistics to infer relationship between the four Native American**  
982                                    **components in Argentina and their genetic affinity with ancient**  
983                                    **populations**

984 Starting from genotype data for the individuals in **DS6**, we also included genotype  
985 data from Yoruba (YRI) population from [45], Mixe population from [38] and,  
986 pseudo-haploid data for Anzick individual from the Clovis culture [74] and USR1  
987 individual from Upward Sun River in Beringia [73]. The resulting data set is called  
988 **DS7**. Within **DS7**, we grouped modern individuals according to their assigned Native  
989 American group and we removed those with inconsistent assignment (**S15 Fig, S4**  
990 **Table**). Thus, **DS7** contains 426 modern individuals, 55 ancient samples, 108  
991 Yoruba and 17 Mixe individuals. **DS7** encompasses 88,564 SNPs. Note that we did  
992 not apply any SNP filtering overall **DS7** in order to maximize the number of SNPs  
993 included in each group comparison considered.

994 Using modern individuals from **DS7**, and considering any possible combination of  
995 the four groups identified (LWL, CCP, CAN and CWA), we computed the  $f_3$  statistics  
996 [85] in the form of  $f_3(\textit{Target}; S_1, S_2)$ . This allowed to contrast whether *Target*,  $S_1$   
997 and  $S_2$  could be organized in the form of a phylogenetic tree (positive  $f_3$ ) or whether  
998 the *Target* group is the result of an admixture event between  $S_1$  and  $S_2$  groups  
999 (negative  $f_3$ ). We also computed  $f_4(\textit{YRI}, \textit{Target}; S_1, S_2)$  to test whether group *Target*  
1000 shares more evolutionary history with group  $S_1$  (negative  $f_4$ ) or group  $S_2$  (positive  
1001  $f_4$ ). Moreover, we reconstructed the Neighbour-joining tree from the matrix of  
1002 distances with Phylip v3.2 [63] and *USR1* ancient sample from the Upward Sun

1003 River Site in Beringia [73] as outgroup. The distances were estimated as  $1/f_3$ -  
1004 *outgroup*(YRI; X, Y).

1005 We computed  $f_3$ -Outgroup and  $f_4$  statistics in order to estimate the genetic affinity of  
1006 the four Native American components with ancient populations from South and  
1007 Central America. We computed the  $f_3$ -outgroup and  $f_4$  statistics in the form of  
1008  $f_3(\text{Yoruba}; X, \text{Ancient})$  and  $f_4(\text{Yoruba}, X; \text{Ancient Beringia}, \text{Ancient})$ , where  $X$  the  
1009 represent the cluster containing all individuals assigned to a given Native American  
1010 ancestry component, Ancient Beringia is the pseudo-haploid individual USR1 from  
1011 the Upward Sun River site in Alaska [73].

1012 We also computed  $f_4$  of the form  $f_4(\text{YRI}, \text{Ancient}; X, Y)$ . This  $f_4$  setting allowed testing  
1013 which of  $X$  or  $Y$ , each referring to one of the four Native American components.  
1014 shares more ancestry with a given *Ancient* group.  $X$  and  $Y$ .

1015 We finally computed  $f_4$  of the form  $f_4(\text{Ancient}, X; Y, \text{YRI})$  to test whether a given  
1016 modern Native American component  $Y$  shares exhibit closer genetic affinity with a  
1017 given *Ancient* group (negative  $f_4$ ) or with another modern Native American  
1018 component  $X$  (positive  $f_4$ ).

1019 All the results based on *F-statistics* are listed in **S5 Table**. We assessed significance  
1020 of a comparison considering 3 standard errors ( $|Z| > 3$ ).

1021



## 1022 **6 Abbreviations**

- 1023 **1KGP:** 1000 Genomes Project
- 1024 **AMBA:** Metropolitan Area of Buenos Aires
- 1025 **CCP:** Central Chile / Patagonia
- 1026 **CWA:** Central Western Region in Argentina
- 1027 **CYA:** Cuyo Region in Argentina
- 1028 **DS:** Data set
- 1029 **LD:** Linkage Disequilibrium
- 1030 **LWL:** Lowlands
- 1031 **NEA:** Northeastern Region in Argentina
- 1032 **NWA:** Northwestern Region in Argentina
- 1033 **PCA:** Principal Component Analysis
- 1034 **PPA:** Pampean Region in Argentina
- 1035 **PTA:** Patagonia Region in Argentina
- 1036 **CAN:** Central Andes
- 1037 **SNP:** Single Nucleotide Polymorphism
- 1038 **YRI:** Yoruba individuals in Ibadan, Nigeria
- 1039

## 1040 **7 Acknowledgments**

1041 In memoriam of Raúl Carnese.

1042 We thank Rolando González-José, Andrea Llera and Mariana Berenstein for the  
1043 management and promotion of the Consorcio Poblar.

1044 We thank all the participants of the different sampling campaigns across Argentina  
1045 from which the newly genotyped samples are derived from.

1046 We thank Ricardo A. Verdugo, Etienne Patin, Luca Pagani, Marta E. Alarcón  
1047 Riquelme and María Teruel Artacho who kindly shared genotype data included in  
1048 this study.

1049 This project has been founded by FONCyT-ANPCyT (PICT2014-1597 attributed to  
1050 HD and PICT3655-2016 attributed to PL) and CONICET (PIP 0208/14 attributed to  
1051 HD and VR)

## 1052 **8 Author Contributions**

1053 **Conceptualization:** Pierre Luisi, Angelina García, Darío Demarchi and Hernán  
1054 Dopazo

1055 **Data acquisition:** Emma Alfaro, Eliana Aquilano, Carina Argüelles, Sergio Avena,  
1056 Graciela Bailliet, Julieta Beltramo, Claudio M. Bravi, Raul Carnese, Mariela Cuello,  
1057 Cristina Dejean, Darío Demarchi, José Edgardo Dipierri, Angelina García, José Luis  
1058 Lanata, Laura Jurado Medina, Josefina Motti, María Laura Parolin, Maia Pauro, Paula  
1059 Paz, Virginia Ramallo, Daniela Rodríguez Golpe, María Rita Santos, Marisol Schwab,  
1060 Natalia Silvero

1061 **Data curation:** Pierre Luisi, Juan Manuel Berros and Jeremias Zubrzycki

1062 **Formal analysis:** Pierre Luisi

1063 **Funding acquisition:** Pierre Luisi, Virginia Ramallo and Hernán Dopazo

1064 **Investigation:**

1065 **Methodology:** Pierre Luisi, Juan Manuel Berros, Darío Demarchi and Hernán  
1066 Dopazo

1067 **Project administration:** Pierre Luisi and Hernán Dopazo  
1068 **Resources:** Juan Manuel Berros and Hernán Dopazo  
1069 **Supervision:** Hernán Dopazo  
1070 **Visualization:** Pierre Luisi.  
1071 **Writing – original draft:** Pierre Luisi, Angelina García and Hernán Dopazo.  
1072 **Writing – review & editing:** Carina Argüelles, Sergio Avena, Darío Demarchi,  
1073 Josefina Motti, Maria Laura Parolin, Maia Pauro.

## 1074 **9 Disclosure Declaration**

1075 PL provides consulting services to myDNAmap S.A. JMB is employed by Biocódices  
1076 S.A. HD is the scientific director of Biocódices S.A.

## 1077 **10 Data Availability Statement:**

1078 The data analyzed here comprises both newly generated and previously reported  
1079 data sets. Access to publicly available data sets should be requested through the  
1080 distribution channels indicated in each published study. For newly genotyped  
1081 samples, individual genotype data will be made available at  
1082 [http://biocodices.hopto.org/Affymetrix\\_Pop\\_Arg/](http://biocodices.hopto.org/Affymetrix_Pop_Arg/) at time of publication.

1083

1084

## 11 Bibliography

- 1085 1. Tishkoff SA, Verrelli BC. Patterns of Human Genetic Diversity: Implications for  
1086 Human Evolutionary History and Disease. *Annu Rev of Genomics Hum Genet.*  
1087 2003;4: 293–340.
- 1088 2. Bravi CM, Sans M, Bailliet G, Martínez-Marignac V, Portas M, Barreto I, et al.  
1089 Characterization of mitochondrial DNA and Y-chromosome haplotypes in a  
1090 Uruguayan population of African ancestry. *Hum Biol.* 1997;69(5): 641–652.
- 1091 3. Sala A, Penacino G, Corach D. Comparison of allele frequencies of eight STR  
1092 loci from Argentinean Amerindian and European populations. *Hum Biol.*  
1093 1998;70(5): 937–947.
- 1094 4. Goicoechea AS, Carnese FR, Dejean CB, Avena SA, Weimer TA, Franco MH, et  
1095 al. Genetic Relationships Between Amerindian Populations of Argentina. *Am J*  
1096 *Phys Anthropol.* 2001;115(2): 133–143.
- 1097 5. Dejean CB, Crouau-Roy B, Goicoechea AS, Avena SA, Carnese FR. Genetic  
1098 variability in Amerindian populations of northern Argentina. *Genet Mol Biol.*  
1099 2004;27(4): 489–495.
- 1100 6. Fejerman L, Carnese FR, Goicoechea AS, Avena SA, Dejean CB, Ward RH.  
1101 African ancestry of the population of Buenos Aires. *Am J Phys Anthropol.*  
1102 2005;128(1): 164–70.
- 1103 7. Wang S, Ray N, Rojas W, Parra MV, Bedoya G, Gallo C, et al. Geographic  
1104 patterns of genome admixture in Latin American mestizos. *PLoS Genet.*  
1105 2008;4(1): e1000037.
- 1106 8. Bobillo MC, Zimmermann B, Sala A, Huber G, Röck A, Bandelt HJ, et al.  
1107 Amerindian mitochondrial DNA haplogroups predominate in the population  
1108 of Argentina: towards a first nationwide forensic mitochondrial DNA  
1109 sequence database. *Int J Legal Med.* 2010;124(4): 263–8.
- 1110 9. Pauro M, García A, Bravi CM, Demarchi DA. Distribucion de haplogrupos  
1111 mitocondriales aloctonos en poblaciones rurales de Córdoba y San Luis. *Rev*  
1112 *Argentina Antropol Biol.* 2010;12(1): 47–55.
- 1113 10. Pauro M, García A, Nores R, Demarchi DA. Analysis of uniparental lineages in  
1114 two villages of Santiago Del Estero, Argentina, seat of Pueblos de Indios in  
1115 colonial times. *Hum Biol.* 2013;85(5): 699–720.
- 1116 11. García A, Pauro M, Bailliet G, Bravi CM, Demarchi DA. Genetic variation in  
1117 populations from central Argentina based on mitochondrial and Y  
1118 chromosome DNA evidence. *J Hum Genet.* 2018;63(4):493-507
- 1119 12. Martínez Marignac VL, Bertoni B, Parra EJ, Bianchi NO. Characterization of  
1120 admixture in an urban sample from Buenos Aires, Argentina, using  
1121 uniparentally and biparentally inherited genetic markers. *Hum Biol.*  
1122 2004;76(4): 543–57.

- 1123 13. Seldin MF, Tian C, Shigeta R, Scherbarth HR, Silva G, Belmont JW, et al.  
1124 Argentine Population Genetic Structure: Large Variance in Amerindian  
1125 Contribution. *Am J Phys Anthropol.* 2007;132(3): 455–62.
- 1126 14. Corach D, Lao O, Bobillo C, van Der Gaag K, Zuniga S, Vermeulen M, et al.  
1127 Inferring continental ancestry of argentineans from autosomal, Y-  
1128 chromosomal and mitochondrial DNA. *Ann Hum Genet.* 2010;74(1): 65–76.
- 1129 15. Parolin ML, Toscanini UF, Velázquez IF, Berardi GL, Holley A, Tamburrini C, et  
1130 al. Genetic admixture patterns in Argentinian Patagonia. *PLoS One.*  
1131 2019;14(6): e0214830.
- 1132 16. Avena SA, Via M, Ziv E, Pérez-Stable EJ, Gignoux CR, Dejean CB, et al.  
1133 Heterogeneity in genetic admixture across different regions of Argentina.  
1134 *PLoS One.* 2012;7(4): e34695.
- 1135 17. García A, Dermarchi DA, Tovo-Rodrigues L, Pauro M, Callegari-Jacques SM,  
1136 Salzano FM, et al. High interpopulation homogeneity in Central Argentina as  
1137 assessed by ancestry informative markers (AIMs). *Genet Mol Biol.*  
1138 2015;38(3): 324–31.
- 1139 18. Salas A, Richards M, Lareu MV, Scozzari R, Coppa A, Torroni A, et al. The  
1140 African diaspora: mitochondrial DNA and the Atlantic slave trade. *Am J Hum*  
1141 *Genet.* 2004;74(3): 454–65.
- 1142 19. Corach D, Figueira Risso L, Marino M, Penacino G, Sala A. Routine Y-STR  
1143 typing in forensic casework. *Forensic Sci Int.* 2001;118(2-3): 131–5.
- 1144 20. Salas A, Jaime JC, Álvarez-Iglesias V, Carracedo A. Gender bias in the  
1145 multiethnic genetic composition of central Argentina. *J Hum Genet.*  
1146 2008;53(7): 662–74.
- 1147 21. García A, Pauro M, Nores R, Bravi CM, Demarchi DA. Phylogeography of  
1148 mitochondrial haplogroup D1: An early spread of subhaplogroup D1j from  
1149 Central Argentina. *Am J Phys Anthropol.* 2012;149(4): 583–90.
- 1150 22. Carnese FR. El mestizaje en la Argentina: indígenas, europeos y africanos: una  
1151 mirada desde la antropología biológica. 1st ed. Ciudad Autónoma de Buenos  
1152 Aires: Editorial de la Facultad de Filosofía y Letras Universidad de Buenos  
1153 Aires; 2019.
- 1154 23. Martínez Sarasola C. Nuestros paisanos los indios. 9th ed. Buenos Aires: Del  
1155 Nuevo Extremo; 2011.
- 1156 24. Devoto F. Historia de la inmigración en la Argentina. 1st ed. Buenos Aires:  
1157 Editorial Sudamericana; 2003.
- 1158 25. Rosal MA (UNESCO). Africanos Esclavizados Llegados al Plata Durante el lapso  
1159 tardocolonial. *Afrodescendencia Aproximaciones contemporáneas de América*  
1160 *Latina y el Caribe.*; 2011. pp. 5–10.
- 1161 26. Guzmán F. Africanos en la Argentina. Una reflexión desprevenida. *Andes.*  
1162 2006;17.

- 1163 27. Borucki A. The Slave Trade to the Río de la Plata, 1777–1812: Trans-Imperial  
1164 Networks and Atlantic Warfare. *Colon Latin Am Rev.* 2011;20(1):81–107.
- 1165 28. Studer E. La trata de negros en el Río de la Plata durante el siglo XVIII. Buenos  
1166 Aires; Instituto de Historia de Argentina "Doctor Emilio Ravignani"; 1958.
- 1167 29. Rodríguez Molas R. Los sometidos de la conquista. Buenos Aires: Centro  
1168 Editor de America Latina; 1985.
- 1169 30. Mandrini R. La Argentina aborígen. De los primeros pobladores a 1910.  
1170 Buenos Aires: Siglo XXI; 2008.
- 1171 31. Lenton DI, Delrio WM, Pérez PMV, Papazian AER, Nagy MA, Musante M.  
1172 Argentina's Constituent Genocide: Challenging the Hegemonic National  
1173 Narrative and Laying the Foundation for Reparations to Indigenous Peoples.  
1174 *Armen Rev.* 2012;53(1-4): 63–84.
- 1175 32. de Jong IL. Guerra, Genocidio y Resistencia: Apuntes para discutir el fin de las  
1176 fronteras en Pampa y Norpatagonia, Siglo XIX. *Habitus.* 2018;16: 229–254.
- 1177 33. Homburger JR, Moreno-Estrada A, Gignoux CR, Nelson D, Sanchez E, Ortiz-  
1178 Tello P, et al. Genomic Insights into the Ancestry and Demographic History of  
1179 South America. *PLOS Genet.* 2015;11(12): e1005602.
- 1180 34. Muzzio M, Motti JMB, Sepulveda PB, Yee MC, Santos MR, Ramallo V, et al.  
1181 Population structure in Argentina. *PLoS One.* 2018;13(5): e0196325.
- 1182 35. Posth C, Nakatsuka N, Lazaridis I, Fehrenschmitz L, Krause J, Reich D, et al.  
1183 Reconstructing the Deep Population History of Central and South America.  
1184 *Cell.* 2018;175(5): 1185–1197.e22
- 1185 36. Moreno-Mayar JV, Vinner L, de Barros Damgaard P, de la Fuente C, Chan J, et  
1186 al. Early human dispersals within the Americas. *Science.* 2018;362(6419): pii:  
1187 eaav2621.
- 1188 37. de la Fuente C, Ávila-arcos MC, Galimany J, Carpenter ML, Homburger JR,  
1189 Blanco A, et al. Genomic insights into the origin and diversification of late  
1190 maritime hunter-gatherers from the Chilean Patagonia. *Proc Natl Acad Sci U S*  
1191 *A.* 2018;115(17): E4006–E4012.
- 1192 38. Reich D, Patterson N, Campbell D, Tandon A, Mazieres S, Ray N, et al.  
1193 Reconstructing Native American population history. *Nature.* 2012;488(7411):  
1194 370–4.
- 1195 39. Gnechchi-ruscione GA, Sarno S, De Fanti S, Gianvincenzo L, Giuliani C, Boattini A,  
1196 et al. Dissecting the Pre-Columbian Genomic Ancestry of Native Americans  
1197 along the Andes – Amazonia Divide. *Mol Biol Evol.* 2019;36(6): 1254–1269.
- 1198 40. Gomez-Carballa A, Pardo-Seco J, Brandini S, Achilli A, Perego UA, Coble MD, et  
1199 al. The peopling of South America and the trans-Andean gene flow of the first  
1200 settlers. *Genome Res.* 2018;28(6):767-779
- 1201 41. Michieli CT. La disolución de la categoría Jurídico-Social de "indio" en el siglo  
1202 XVIII: El caso de San Juan (Región de Cuyo). San Juan: Instituto de

- 1203 Investigaciones Arqueológicas y Museo UNSJ; 2000.
- 1204 42. Katzer L. El mestizaje como dispositivo biopolítico. *Biblos. Pueblos indígenas*  
1205 Interculturalidad, colonialidad, política. La Plata: Biblos; 2009. pp. 59–7.
- 1206 43. Briones C. Construcciones de aboriginalidad en Argentina. *Société suisse des*  
1207 *Américanistes / Schweizerische Amerikanisten-Gesellschaft*. 2004; *Bulletin*  
1208 68: 73–90.
- 1209 44. Patterson N, Price AL, Reich D. Population structure and eigenanalysis. *PLoS*  
1210 *Genet*. 2006;2(12): e190
- 1211 45. The 1000 Genomes Project Consortium. A global reference for human genetic  
1212 variation. *Nature*. 2015;526(7571): 68–74.
- 1213 46. Alexander DH, Novembre J, Lange K. Fast model-based estimation of ancestry  
1214 in unrelated individuals. *Genome Res*. 2009;19(9): 1655–64.
- 1215 47. Maples BK, Gravel S, Kenny EE, Bustamante CD. RFMix: A discriminative  
1216 modeling approach for rapid and robust local-ancestry inference. *Am J Hum*  
1217 *Genet*. 2013;93(2): 278–288.
- 1218 48. Nelson MR, Bryc K, King KS, Indap A, Boyko AR, Novembre J, et al. The  
1219 Population Reference Sample, POPRES: A Resource for Population, Disease,  
1220 and Pharmacological Genetics Research. *Am J Hum Genet*. 2008;83(3): 347–  
1221 58.
- 1222 49. Novembre J, Johnson T, Bryc K, Kutalik Z, Boyko AR, Auton A, et al. Genes  
1223 mirror geography within Europe. *Nature*. 2008;456(7218): 98–101.
- 1224 50. Gallero MC, Krautstohl EM. Proceso de poblamiento y migraciones en la  
1225 Provincia de Misiones , Argentina ( 1881-1970 ). Posadas: *Avá Rev Antropol*.  
1226 2010;16: 1881–1970.
- 1227 51. Patin E, Lopez M, Grollemund R, Verdu P, Harmant C, Quach H, et al.  
1228 Dispersals and genetic adaptation of Bantu-speaking populations in Africa and  
1229 North America. *Science*. 2017;356(6337): 543–546.
- 1230 52. Pagani L, Kivisild T, Tarekegn A, Ekong R, Plaster C, Romero IG, et al.  
1231 Ethiopian Genetic Diversity Reveals Linguistic Stratification and Complex  
1232 Influences on the Ethiopian Gene Pool. *Am J Hum Genet*. 2012;91(1): 83–96.
- 1233 53. Schlebusch CM, Skoglund P, Sjödin P, Gattepaille LM, Hernandez D, Jay F, et al.  
1234 Genomic Variation in Seven Khoe-San Groups Reveals Adaptation and  
1235 Complex African History. *Science*. 2012;338(6105): 374–9.
- 1236 54. Judica C. Análisis antropogenético de la población afrodescendiente de la  
1237 Región de Noryungas, Bolivia. PhD Thesis. Universidad de Buenos Aires. 2017.
- 1238 55. Moreno-Estrada A, Gravel S, Zakharia F, McCauley JL, Byrnes JK, Gignoux CR,  
1239 et al. Reconstructing the Population Genetic History of the Caribbean. *PLoS*  
1240 *Genet*. 2013;9(11): e1003925
- 1241 56. Fortes-Lima C, Gessain A, Ruiz-Linares A, Bortolini MC, Migot-Nabias F, Bellis

- 1242 G, et al. Genome-wide Ancestry and Demographic History of African-  
1243 Descendant Maroon Communities from French Guiana and Suriname. *Am J*  
1244 *Hum Genet.* 2017;101(5): 725–736.
- 1245 57. Bryc K, Auton A, Nelson MR, Oksenberg JR, Hauser SL, Williams S, et al.  
1246 Genome-wide patterns of population structure and admixture in West  
1247 Africans and African Americans. *Proc Natl Acad Sci U S A.* 2010;107(2): 786–  
1248 91.
- 1249 58. Pauro M. Análisis molecular de linajes uniparentales en poblaciones humanas  
1250 del centro de Argentina. PhD Thesis. Universidad de Córdoba. 2015.
- 1251 59. Di Fabio Rocca F. La presencia subsahariana en el acervo génico de  
1252 poblaciones cosmopolitas de la Argentina. PhD Thesis. Universidad de Buenos  
1253 Aires. 2016.
- 1254 60. Raghavan M, Steinrücken M, Harris K, Schiffels S, Rasmussen S, DeGiorgio M,  
1255 et al. Genomic evidence for the Pleistocene and recent population history of  
1256 Native Americans. *Science.* 2015;349(6250): aab3884.
- 1257 61. Lindo J, Haas R, Hofman C, Apata M, Moraga M, Verdugo RA, et al. The genetic  
1258 prehistory of the Andean highlands 7000 years BP though European contact.  
1259 *Sci Adv.* 2018;4(11): eauu4921.
- 1260 62. Modolo VE. Análisis histórico-demográfico de la inmigración en la Argentina  
1261 del Centenario al Bicentenario. *Papeles de Población.* 2016;22(89): 201–222.
- 1262 63. Felsenstein J. PHYLIP: Phylogeny Inference Package (Ver. 3.2). *Cladistics.*  
1263 1989;5: 164–166.
- 1264 64. Motti JMB, Muzzio M, Ramallo V, Kladniew BR, Alfaro EL, Dipierri JE, et al.  
1265 Origen Y Distribución Espacial De Linajes Maternos Nativos En El Noroeste Y  
1266 Centro Oeste Argentinos. *Rev Argentina Antropol Biol.* 2013;15(1): 3–14.
- 1267 65. Motti JMB, Schwab ME, Beltramo J, Jurado-medina LS, Muzzio M, Ramallo V, et  
1268 al. Regional differentiation of native American populations from the analysis  
1269 of maternal lineages. *Intersecc en Antropol.* 2017;18(3): 271–282.
- 1270 66. Motti J. Caracterización de Linajes Maternos en la Población Actual del  
1271 Noroeste y Centro-Oeste Argentinos. PhD Thesis. Universidad Nacional de La  
1272 Plata. 2012.
- 1273 67. Canals Frau S. Etnología de los Huarpes. Una síntesis. *Anales del Instituto de*  
1274 *Etnología Americana.* Mendoza; *Anales del Instituto de Etnología Americana,*  
1275 *Tomo VII; 1946. pp. 9–147.*
- 1276 68. Escolar D. Los dones étnicos de la Nación. *Identidades huarpe y modos de*  
1277 *producción de soberanía en Argentina.* Buenos Aires; Prometeo; 2007.
- 1278 69. Bengoa J. Historia de los antiguos mapuches del sur. Desde antes de la llegada  
1279 de los españoles hasta las paces de Quilín. Santiago: Catalonia; 2003.
- 1280 70. Galdames S. ¿Detuvo la batalla del Maule la expansión Inca hacia el sur de  
1281 Chile? *Cuadernos Hist.* 1989;3: 7–25.



- 1282 71. Michieli CT. Antigua historia de Cuyo. San Juan: Ansilta; 1994.
- 1283 72. Gascón M. Cuyo en el espacio imperial. La fase de configuración: 1580-1680.  
1284 Rev Tefros. 2011;9(1-2): 6.
- 1285 73. Moreno-Mayar JV, Potter BA, Vinner L, Steinrücken M, Rasmussen S, Terhorst  
1286 J, et al. Terminal Pleistocene Alaskan genome reveals first founding  
1287 population of Native Americans. Nature. 2018;553(7687): 203–207.
- 1288 74. Rasmussen M, Anzick SL, Waters MR, Skoglund P, Degiorgio M, Stafford TW Jr,  
1289 et al. The genome of a Late Pleistocene human from a Clovis burial site in  
1290 western Montana. Nature. 2014;506(7487): 225–229.
- 1291 75. Dopazo H, Llera AS, Berenstein M, Gonzáles-José R. Genomas , enfermedades y  
1292 medicina de precisión : un Proyecto Nacional. Ciencia, Tecnol y Política.  
1293 2019;2(2): 1–10.
- 1294 76. Team RC. R: A language and environment for statistical computing. R  
1295 Foundation for Statistical Computing, Vienna, Austria. 2019.
- 1296 77. Wall L, Christiansen T, Orwant J. Programming perl. O'Reilly M. 2000.
- 1297 78. Chang CC, Chow CC, Tellier LCAM, Vattikuti S, Purcell SM, Lee JJ. Second-  
1298 generation PLINK: Rising to the challenge of larger and richer datasets.  
1299 Gigascience. 2015;4:7.
- 1300 79. Danecek P, Auton A, Abecasis G, Albers CA, Banks E, Depristo MA, et al. The  
1301 variant call format and VCFtools. Bioinformatics. 2011;27(15): 2156–8.
- 1302 80. Quinlan AR, Hall IM. BEDTools : a flexible suite of utilities for comparing  
1303 genomic features. Bioinformatics. 2010;26(6): 841–842.  
1304 doi:10.1093/bioinformatics/btq033
- 1305 81. Manichaikul A, Mychaleckyj JC, Rich SS, Daly K, Sale M, Chen WM. Robust  
1306 relationship inference in genome-wide association studies. Bioinformatics.  
1307 2010;26(22): 2867–73.
- 1308 82. Delaneau O, Marchini J, Zagury J-F. A linear complexity phasing method for  
1309 thousands of genomes. Nat Methods. 2011;9(2): 179–181.
- 1310 83. Delaneau O, Zagury J, Marchini J. Improved whole chromosome phasing for  
1311 disease and population genetic studies. Nat Methods. 2013;10(1): 5-6.
- 1312 84. Martin AR, Gignoux CR, Walters RK, Wojcik GL, Neale BM, Gravel S, et al.  
1313 Human Demographic History Impacts Genetic Risk Prediction across Diverse  
1314 Populations. Am J Hum Genet. 2017;100(4): 635–649.
- 1315 85. Patterson N, Moorjani P, Luo Y, Mallick S, Rohland N, Zhan Y, et al. Ancient  
1316 admixture in human history. Genetics. 2012;192(3): 1065–93.
- 1317

## 1318 12 Supplementary Figure Captions

### 1319 **S1 Fig. Principal component analysis in a Worldwide Context.**

1320 The percentage of variance explained by each principal component (PC) is given.  
1321 Each point represents an individual following the color and point codes given in  
1322 legend. **A:** PC2 vs PC1; **B:** PC4 vs PC3; **C:** PC6 vs PC5.

### 1323 **S2 Fig. Admixture Analyses in a Worldwide Context.**

1324 **(A)** Cross-Validation score for Admixture runs on the global meta dataset with  $K$   
1325 from 3 to 12. **(B-G)** Admixture results with  $K=3$  to  $K=8$ . 1KGP: 1000 Genomes  
1326 Project; CYA: Cuyo Region in Argentina; NEA: Northeastern Region in Argentina,  
1327 NWA: Northwestern Region in Argentina; PPA: Pampean Region in Argentina; PTA:  
1328 Patagonia Region in Argentina.

### 1329 **S3 Fig. Comparison of Different Admixture Continental Ancestry Proportion** 1330 **Estimates in a Worldwide Context.**

1331 Comparison of the African, European and Native American ancestry proportion  
1332 estimates obtained with Admixture with  $K=3$  and  $K=8$ . Individuals are represented  
1333 with points according to the legend of Figure 2. **(A)** African ancestry proportions for  
1334  $K=3$  are as observed in green in Supplementary S2B Fig, while for  $K=8$  they are  
1335 estimated as the sum of the three greenish colors observed in S1D-G Figs. **(B)**  
1336 European ancestry proportions for  $K=3$  are as observed in blue in Supplementary  
1337 S2B Fig, while for  $K=8$  they are estimated as the sum of the two bluish colors  
1338 observed in S1D-G Figs. **(C)** Native American ancestry proportions for  $K=3$  are as  
1339 observed in orange in S2B Fig, while for  $K=8$  they are estimated as the sum of the  
1340 three reddish colors observed in S2D-G Figs.

### 1341 **S4 Fig. Comparison of Different Admixture Continental Ancestry Proportions** 1342 **Among Different Samples.**

1343 Comparison of ancestry proportion estimates with admixture ( $K=8$ ) among samples  
1344 from the present study, and Argentinean, Chilean and Peruvian samples from [33].  
1345 **(A)** African Ancestry, **(B)** European Ancestry, **(C)** Native American Ancestry.  $P$ -value  
1346 of the Wilcoxon test for each pairwise comparison is shown.

### 1347 **S5 Fig. Comparison of Admixture and RFMix Ancestry Proportion Estimates in** 1348 **DS2p and DS3p.**

1349 **(A-F)** For **DS2p**: Argentinean samples from the present study with reference panel  
1350 that consists in 1KGP individuals from Africa, Europe and America [45] and Chilean  
1351 individuals from [37]. **(A-C)** Native American, European and African ancestry  
1352 proportions estimates with RFMix vs with Admixture with  $K=3$ . **(D-F)** Native  
1353 American, European and African ancestry proportions estimates with RFMix vs with  
1354 Admixture ( $K=7$ ). **(G-L)** For **DS3p**: Argentinean samples from [33] with reference  
1355 panel that consists in 1KGP individuals from Africa, Europe and America [45]. **(G-I)**  
1356 Native American, European and African ancestry proportions estimates with RFMix

1357 vs with Admixture with  $K=3$ . **(J-L)** Native American, European and African ancestry  
1358 proportions estimates with RFMix vs with Admixture with  $K=5$ .

1359 **S6 Fig. Example of a Local Ancestry Output.**

1360 **(A)** RFMIX output for a given admixed individual. **(B)** Masked genotype showing  
1361 ditypes of Native American (red), European (blue) and African (green) ancestry.  
1362 Gaps are represented in grey and regions with unassigned ancestry (Unknown) are  
1363 in black.

1364 **S7 Fig. European Ancestry Specific Admixture Analysis.**

1365 **(A)** Cross-Validation scores for  $K$  from 2 to 10. **(B)** Admixture plots for  $K=2$ . **(C)**  
1366 Admixture plots for  $K=3$ . CYA: Cuyo Region in Argentina; NEA: Northeastern Region  
1367 in Argentina, NWA: Northwestern Region in Argentina; PPA: Pampean Region in  
1368 Argentina; PTA: Patagonia Region in Argentina.

1369 **S8 Fig. European Ancestry Specific Principal Component Analysis.**

1370 **(A)** Multidimensional scaling based on the weighted Euclidean distance for PCs 1 to  
1371 3. Individuals from the European reference panel are colored according to main  
1372 European geographic regions as shown in **(B)** while South American admixed  
1373 individuals are represented as shown in the legend. Elbow method to choose the  
1374 number of relevant PCs is shown as inset within **(A)**.

1375 **S9 Fig. Choose The Number Of Principal Components From African Ancestry-**  
1376 **Specific Principal Component Analysis.**

1377 Elbow method to determine which PC minimizes the angle of the curve from the  
1378 chat “Percentage of variance explained *versus* Number of PCs”

1379 **S10 Fig. African Ancestry-Specific Admixture Analysis**

1380 **(A)** Cross-validation scores  $K$  from 2 to 10. **(B)** Admixture plots for  $K=2$ . **(C)**  
1381 Admixture plots for  $K=3$ . **(D)** Admixture plots for  $K=4$ . CYA: Cuyo Region in  
1382 Argentina; NEA: Northeastern Region in Argentina, NWA: Northwestern Region in  
1383 Argentina; PPA: Pampean Region in Argentina; PTA: Patagonia Region in Argentina

1384 **S11 Fig. Choose The Number Of Principal Components From Native American**  
1385 **Ancestry-Specific Principal Component Analysis.**

1386 Elbow method to determine which PC minimizes the angle of the curve from the  
1387 chart “Percentage of variance explained *versus* Number of PCs”

1388 **S12 Fig. Native American Ancestry-Specific Admixture Analysis**

1389 **(A)** Cross-validation scores  $K$  from 2 to 10. **(B)** Admixture plots for  $K=2$ . **(C)**  
1390 Admixture plots for  $K=4$ . **(D)** Admixture plots for  $K=5$ . CYA: Cuyo Region in  
1391 Argentina; NEA: Northeastern Region in Argentina, NWA: Northwestern Region in  
1392 Argentina; PPA: Pampean Region in Argentina; PTA: Patagonia Region in Argentina

1393 **S13 Fig. Correlation of Native American Ancestry Proportions and**  
1394 **Geographical Coordinates in Argentina**

1395 **(A)** Central Andes ancestry proportions vs Latitude. **(B)** Central Andes ancestry  
1396 proportions vs Longitude. **(C)** Lowlands ancestry proportions vs Latitude. **(D)**

- 1397 Lowlands ancestry proportions vs Longitude. **(E)** Central Chile/Patagonia ancestry  
1398 proportions vs Latitude. **(F)** Central Chile/Patagonia ancestry proportions vs  
1399 Longitude. Linear regression slopes and the associated  $P$ -values are shown.
- 1400 **S14 Fig. Comparison of Native American Ancestry Proportion Estimates**  
1401 **Obtained with Admixture Run on Unmasked Data ( $K=8$ ) and Masked data**  
1402 **( $K=3$ ).**  
1403 Spearman correlation coefficients and associated  $P$ -values are shown. CAN: Central  
1404 Andes; LWL: Lowlands; CCP: Central Chile / Patagonia.
- 1405 **S15 Fig. Individual Assignment to a Native American Ancestry Cluster.**  
1406 Consensus clustering South American individuals based on three  $K$ -means  
1407 procedures run with different pairwise distances among individuals. **(Top)**  $K$ -means  
1408 results using Ancestry-Specific PCA and Admixture (ASPCA and AS-Admixture), and  
1409  $f_3$  results to compute pairwise distances. Individuals are represented as in **Main Fig**  
1410 **4**. Insets: BIC score for number of clusters set to  $K$ -means ranging from 2 to 20. In all  
1411 the three cases,  $K$ -means BIC was minimized when considering 4 clusters. **(Bottom)**  
1412 Same as top with point colors corresponding to the assigned cluster.
- 1413 **S16 Fig. Pairwise Genetic Affinity Among Individuals Assigned to Different**  
1414 **Groups.**  
1415 Boxplots of the  $1-f_3(YRI; Ind1, Ind2)$ , where  $Ind1$  and  $Ind2$  are two individuals  
1416 belonging to Group 1 and Group 2, respectively. The groups are either the fourth  
1417 Native American components identified or ancient Southern Cone groups from  
1418 Middle Holocene. For clarity, boxplot outliers are not shown. YRI: Yoruba from  
1419 1KGP.
- 1420 **S17 Fig. Graphical Visualization of Pairwise Genetic Distances Among Groups**  
1421 **in South America**  
1422 **(A)** Neighbor-joining tree from distances of the form  $1/f_3(YRI; X, Y)$ . USR1 from  
1423 Ancient Beringia was used as *outgroup* **(B)** Multidimensional-scaling from distances  
1424 of the form  $1-f_3(YRI; X, Y)$ . Each group is represented as appearing in the leaf of (A).  
1425 USR1 and Anzick-1 were not considered in (B). YRI: Yoruba from 1KGP
- 1426 **S18 Fig. Genetic Affinity of the Four Native American Components with Ancient**  
1427 **Groups.**  
1428 **(A-D)**  $f_3(YRI; X; Ancient)$ . **(E-H)**  $f_4(YRI, X; Ancient\ Beringia, Ancient)$ . **(A)** and **(E)**:  
1429 with Central Andes (CAN) as  $X$ . **(B)** and **(F)**: With Lowlands (LWL) as  $X$ . **(C)** and **(G)**:  
1430 With Central Chile / Patagonia (CCP) as  $X$ . **(D)** and **(H)**: With Central Western  
1431 Argentina (CWA) as  $X$ . YRI: Yoruba from 1KGP; *Ancient Beringia*: USR1 individual  
1432 from [73];  $X$ : Native American component in Argentina (one plot per  $X$ ). *Ancient*:  
1433 ancient group labeled on the  $x$ -axis and represented with a point/color scheme as in  
1434 **Main Figure 4**. Vertical segments are the  $\pm 3$  standard errors intervals.
- 1435 **S19 Fig. Changes Across Time of Genetic Affinity of the Four Native American**  
1436 **Components with Ancient Groups.**

1437 Each point represents a  $f_4$  score of the form  $f_4(YRI, X; Ancient\ Beringia, Ancient)$  vs  
1438 the age of ancient sample, where  $X$  is one of the four identified Native American  
1439 components, and  $Ancient$  is an ancient group.  $X$  is represented by the color of the  
1440 square while  $Ancient$  is represented by the point within the square. The point code  
1441 of the ancient samples is shown in Fig.4. *Ancient Beringia*: USR1 individual from  
1442 [73]. **(A)**  $f_4$  vs age of ancient samples from Southern Cone. **(B)**  $f_4$  vs age of ancient  
1443 samples from Andes. **(C)**  $f_4$  vs age of ancient samples from Southern Cone  
1444 considering age correction. **(D)**  $f_4$  vs age of ancient samples from Andes considering  
1445 age correction. Linear regression slopes and the associated  $P$ -values are shown.  
1446 CAN: Central Andes; LWL: Lowlands; CCP: Central Chile / Patagonia; CWA: Central  
1447 Western Argentina; YRI: Yoruba from 1KGP

1448 **S20 Fig. Comparison of Genetic Affinity of an Ancient Group to a Native**  
1449 **American Component Relative to Another.**

1450  $f_4(YRI, Ancient, X, Y)$  where  $X$  and  $Y$  are two of the four identified Native American  
1451 components (one plot per  $X$ - $Y$  combination), and  $Ancient$  is ancient group labeled on  
1452 the  $x$ -axis and represented with a point/color scheme as in Main Figure 4. Vertical  
1453 segments are the  $\pm 3$  standard errors intervals. Note this setting for  $f_4$  statistics is  
1454 symmetrical when switching  $X$  and  $Y$ .

1455 **S21 Fig. Comparison of Genetic Affinity of a Native American Component to**  
1456 **Another Relative to an Ancient Group.**

1457  $f_4(Ancient, X; Y, YRI)$  where  $X$  and  $Y$  are two of the four identified Native American  
1458 components (one plot per  $X$ - $Y$  combination), and  $Ancient$  is ancient group labeled on  
1459 the  $x$ -axis and represented with a point/color scheme as in Main Figure 4. Vertical  
1460 segments are the  $\pm 3$  standard errors intervals. CAN: Central Andes; LWL:  
1461 Lowlands; CCP: Central Chile / Patagonia; CWA: Central Western Argentina; YRI:  
1462 Yoruba from 1KGP

1463 **S22 Fig. Removing Admixed Santiago de Chile Individuals from Analyses Does**  
1464 **Not Affect the Results.**

1465 Admixed individuals from Santiago de Chile were removed to perform the analyses  
1466 presented in this figure. **(A)**  $f_3(Target; S1, S2)$  to test for treeness; **(B)**  $f_4(YRI, Target;$   
1467  $S1, S2)$  to test whether Target shares more ancestry with  $S1$  or  $S2$ ; **(C)**  $f_3(YRI; CWA;$   
1468  $Ancient)$ ; **(D)**  $f_4(YRI, CWA; Ancient\ Beringia, Ancient)$ ; **(E)**  $f_4(Ancient, CCP; CWA, YRI)$ ;  
1469 **(F)**  $f_4(Ancient, CWA; CCP\ YRI)$ ; **(G)**  $f_4(YRI, Ancient; CWA, CCP)$ . CCP: Central Chile /  
1470 Patagonia.

1471 **S23 Fig. Schematic Routes for the Main Population Arrivals in the Southern**  
1472 **Cone.**

1473 Each arrow represents one of the four components discussed throughout the article.  
1474 Neither disentangling the time and place of the splits among these components nor  
1475 the extent of potential gene flow have been addressed in this study.

1476 **S24 Fig. Admixture Analyses in DS2 to Define European, African and Native**  
1477 **American Reference Individuals for Local Ancestry Analyses**

1478 **(A)** Cross-validation scores from  $K=3$  to  $K=10$ . **(B)** Admixture plot for  $K=7$

1479 **S25 Fig. Admixture Analyses in DS3 to Define European, African and Native**  
1480 **American Reference Individuals for Local Ancestry Analyses**  
1481 **(A)** Cross-validation scores from  $K=3$  to  $K=10$ . **(B)** Admixture plot for  $K=5$

## 1482 **13 Supplementary Table Captions**

### 1483 **S1 Table. Sample information.**

1484 Sampling location, Gender, uniparental lineages, Affymetrix QC metrics, Color and  
1485 Point coding used for plots throughout the article.

### 1486 **S2 Table. Data sets (DS) used throughout the article.**

### 1487 **S3 Table. Ancestry proportion estimates in a worldwide context.**

1488 Ancestry proportion estimates from Admixture analyses with  $K=3$  and  $K=8$  at the  
1489 worldwide level. The column names describe the labels attributed to each ancestry  
1490 detecting for both Admixture analyses, as well as the hexadecimal code for the color  
1491 used to represent it in the corresponding admixture plot. The columns "Point",  
1492 "Color" and "cex" list the graphic parameters used to represent each individual in  
1493 the different plots throughout the article.

### 1494 **S4 Table. Native American cluster assignment.**

1495 Individual Native American cluster assignment is given for each of the  $K$ -means  
1496 procedures and for the consensus call (columns "F3", "PCA", "Admixture" and  
1497 "Consensus"). The ancestry proportion estimates from Admixture analyses with  $K=3$   
1498 on the masked data for Native American ancestry are also provided. The column  
1499 names explicit the labels attributed to each ancestry detecting for both Admixture  
1500 analyses as well as the hexadecimal code for the color. The column "Argentinean  
1501 describes whether an individual was used for Argentinean territory specific  
1502 analyses or not. For admixed individuals (from the present study and [33]), the  
1503 "Population" and "Region" columns list the locality and province, respectively, while  
1504 for Native American population (from [37,38]) the "Population" and "Region"  
1505 columns list the ethnic and main ethnic groups, respectively.

### 1506 **S5 Table. $F$ -statistics results**

1507 **(A)**  $f_3(\text{Target}; S1, S2)$  only for comparisons including Native American components  
1508 **(B)**  $f_4(\text{YRI}, \text{Target}; S1, S2)$  only for comparisons including Native American  
1509 components **(C)**  $f_3(\text{YRI}; X, Y)$  only for comparisons including Ancient Beringia, Mixe  
1510 and Native American components **(D)**  $f_3(\text{YRI}; X, Y)$  where  $X$  and  $Y$  can be either an  
1511 ancient group or one of the four Native American components. **(E)**  $f_4(\text{YRI}, X; \text{Ancient}$   
1512  $\text{Beringia}, \text{Ancient})$  only for comparisons including between a Native American  
1513 components ( $X$ ) and an ancient group ( $\text{Ancient}$ ). **(F)**  $f_4(\text{YRI}, \text{Ancient}, X, Y)$  only for  
1514 comparisons including two Native American components ( $X, Y$ ) and an ancient  
1515 group ( $\text{Ancient}$ ). **(G)**  $f_4(\text{Ancient}, X; Y, \text{YRI})$  only for comparisons including two Native  
1516 American components ( $X, Y$ ) and an ancient group ( $\text{Ancient}$ ). YRI: Yoruba from 1KGP

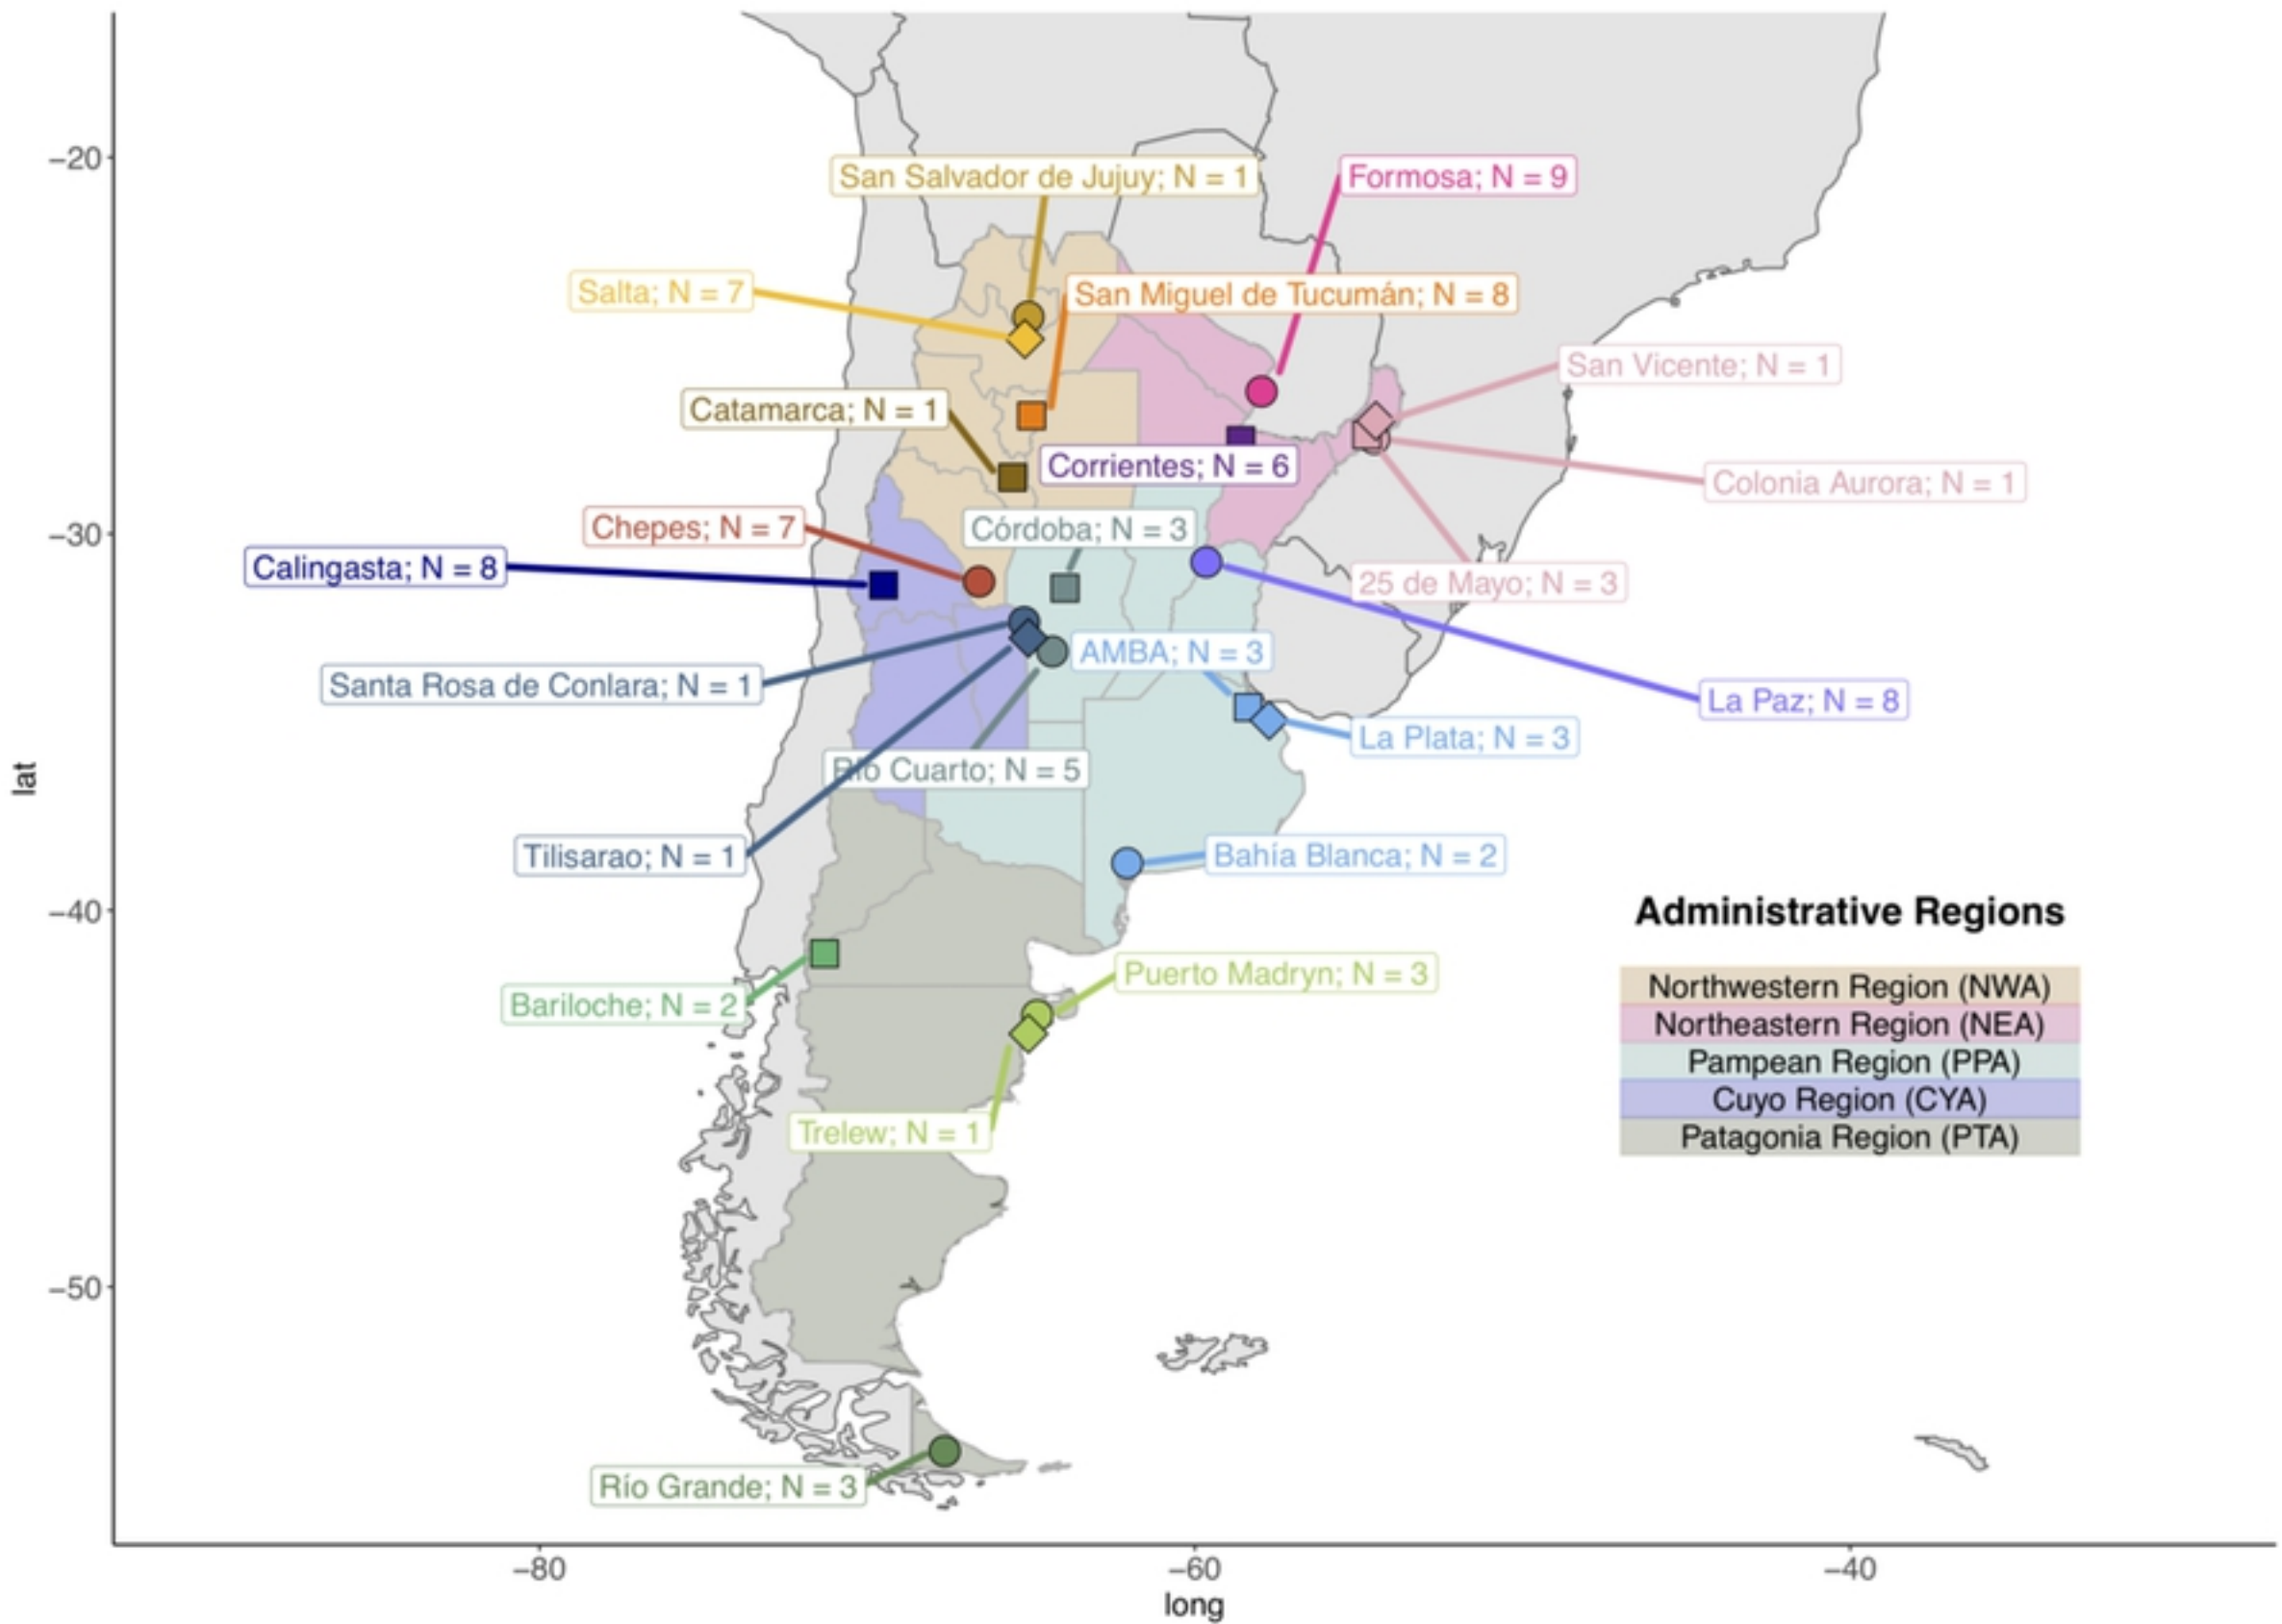

Fig 1. Sample locations from the present study

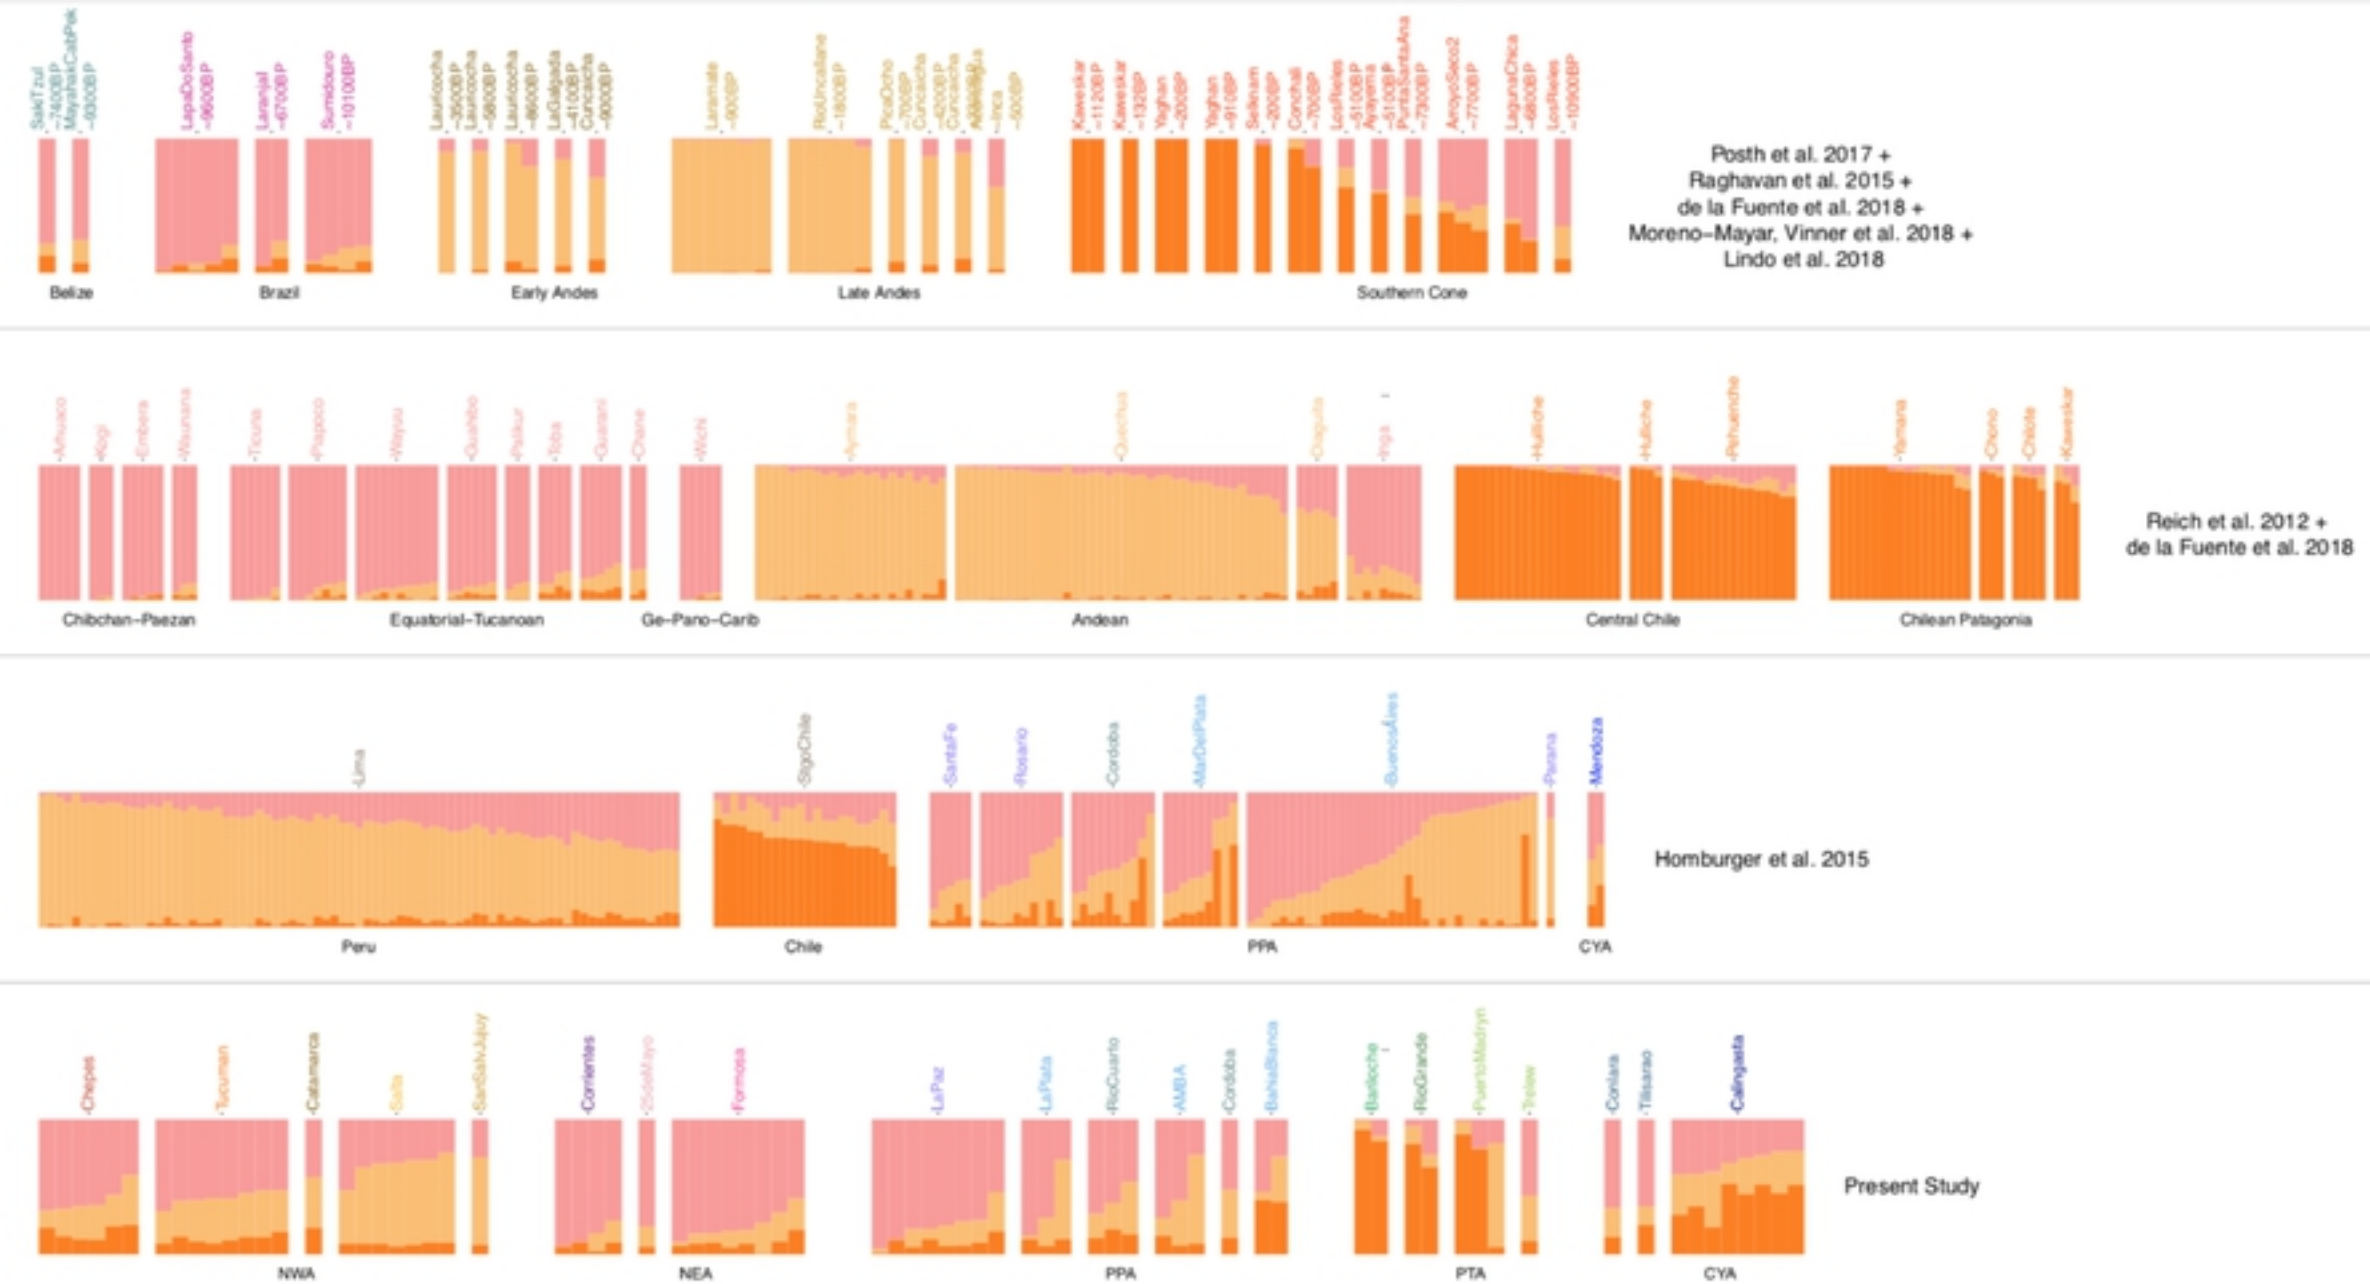

Fig 5. Native American Ancestry-Specific Admixture Analysis.



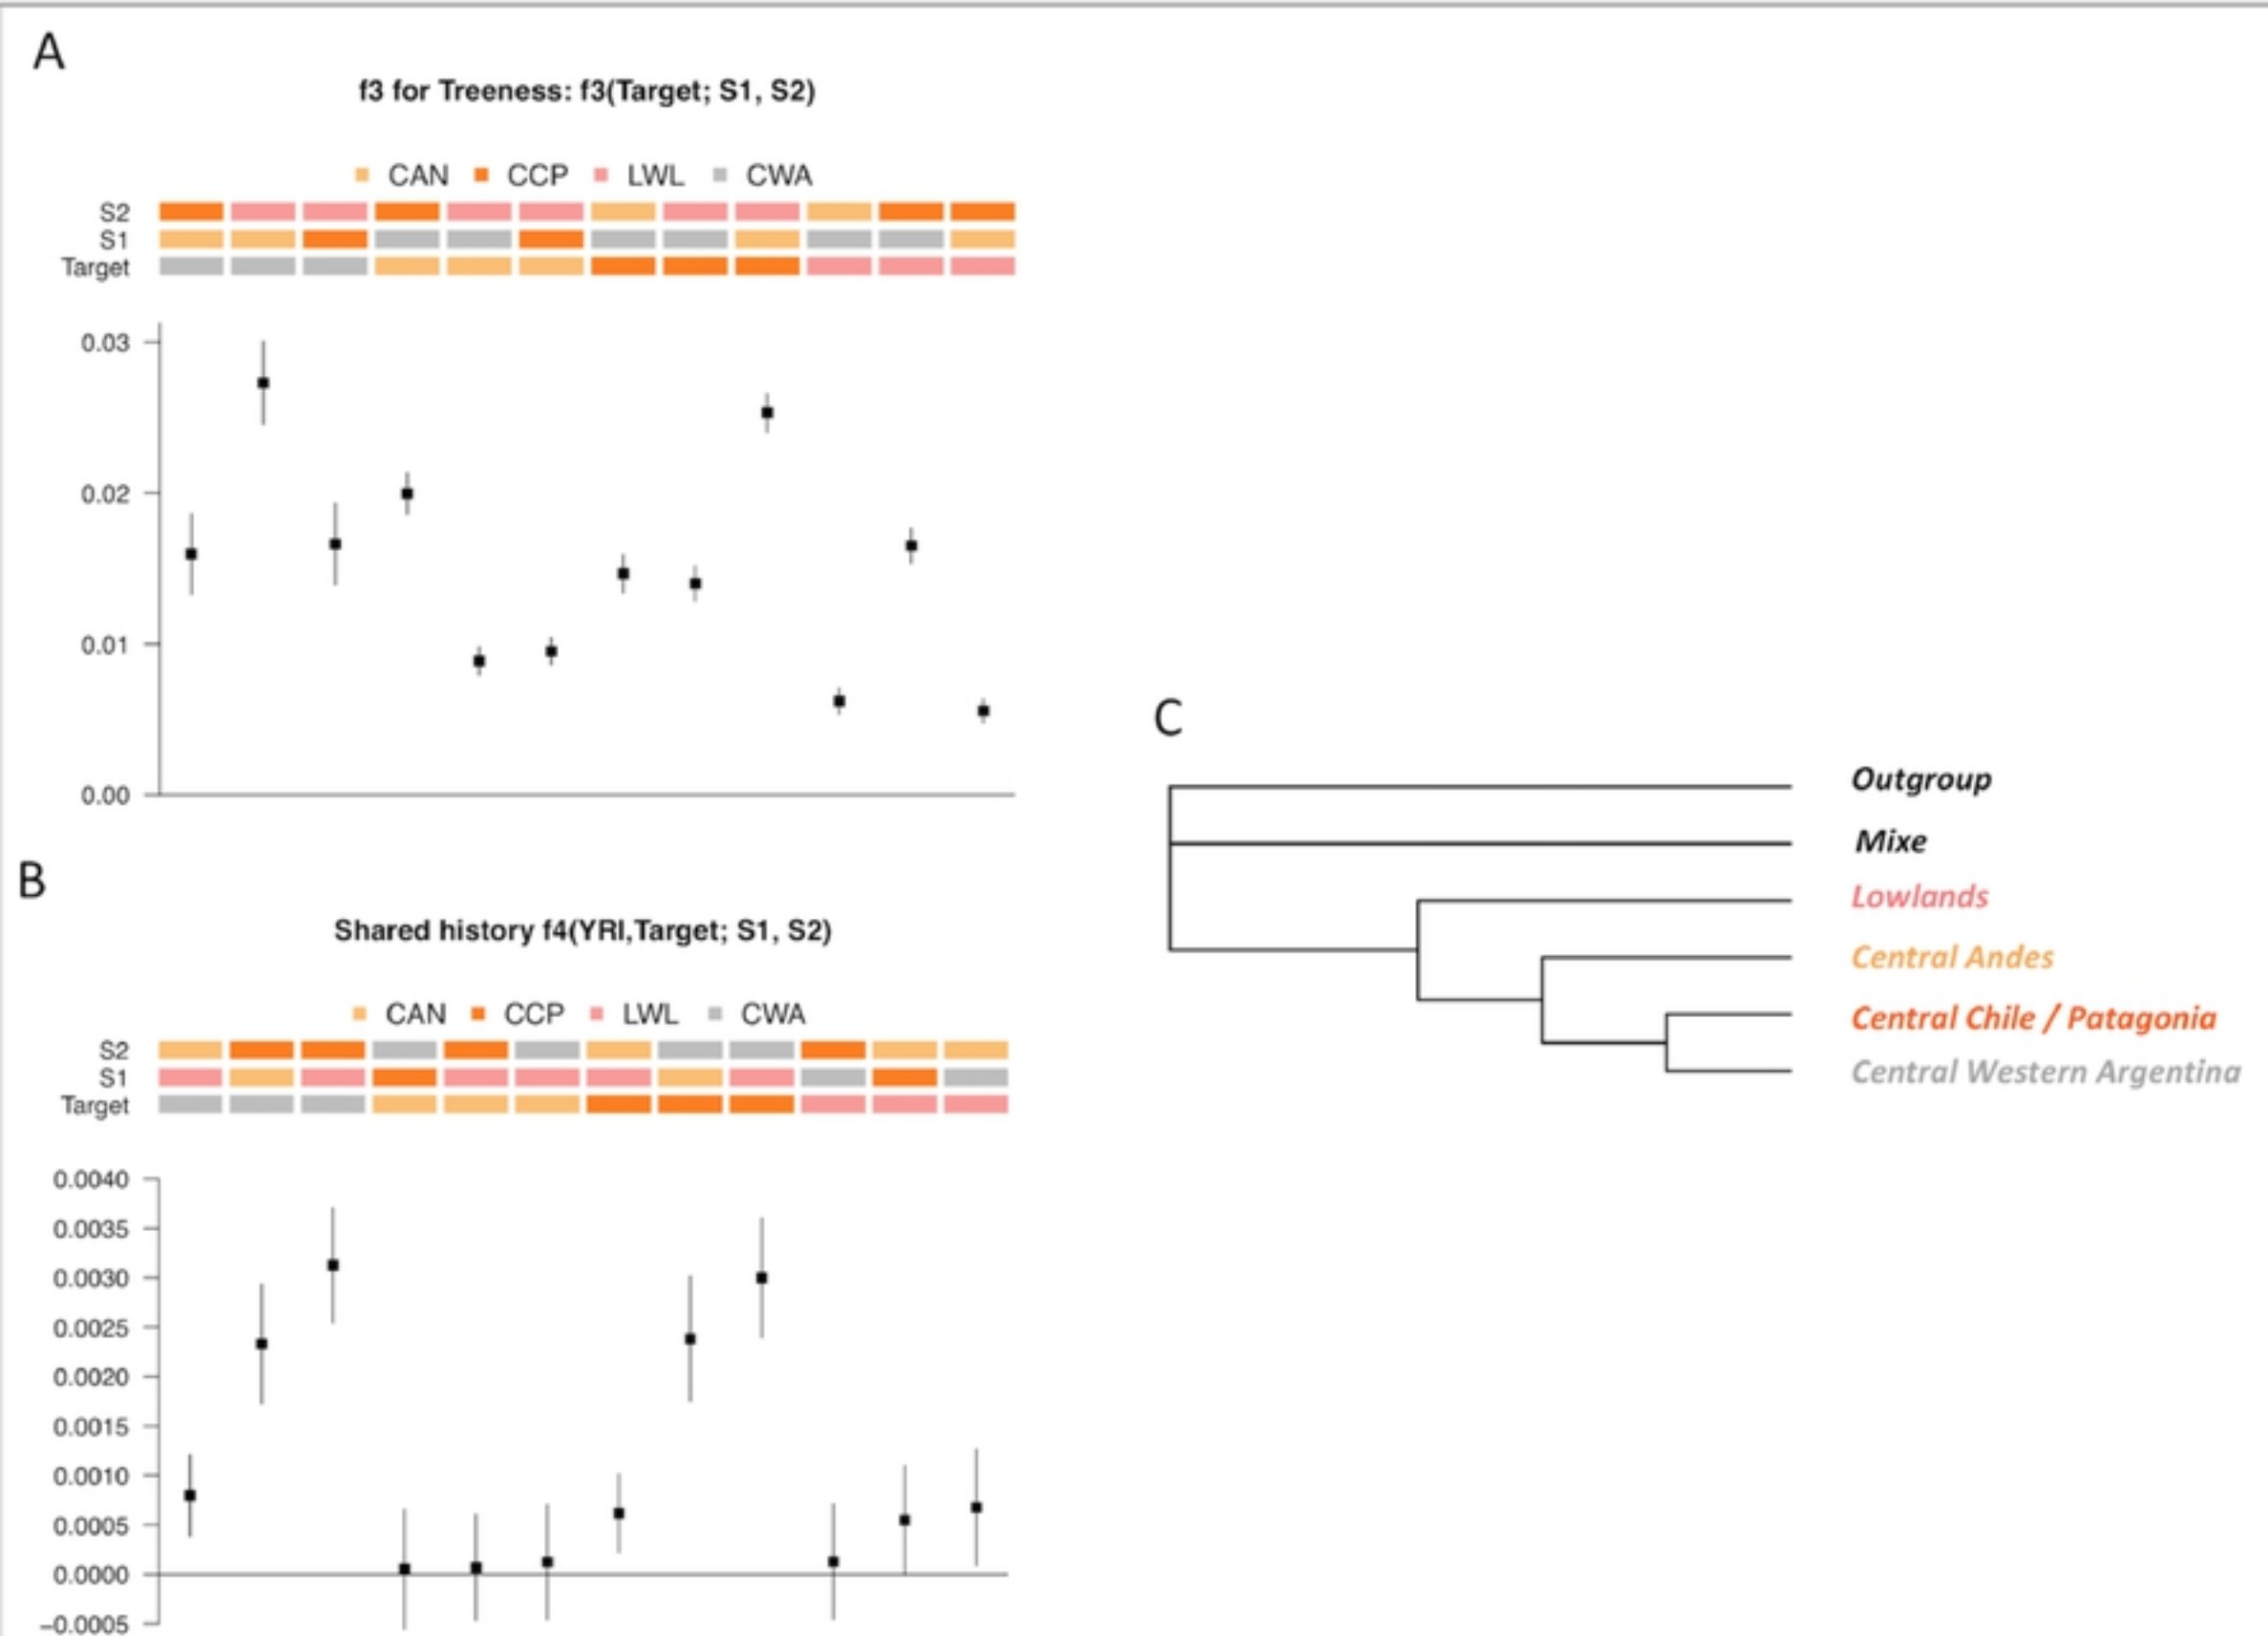

Fig 6. Relationship among the four Native American groups iden

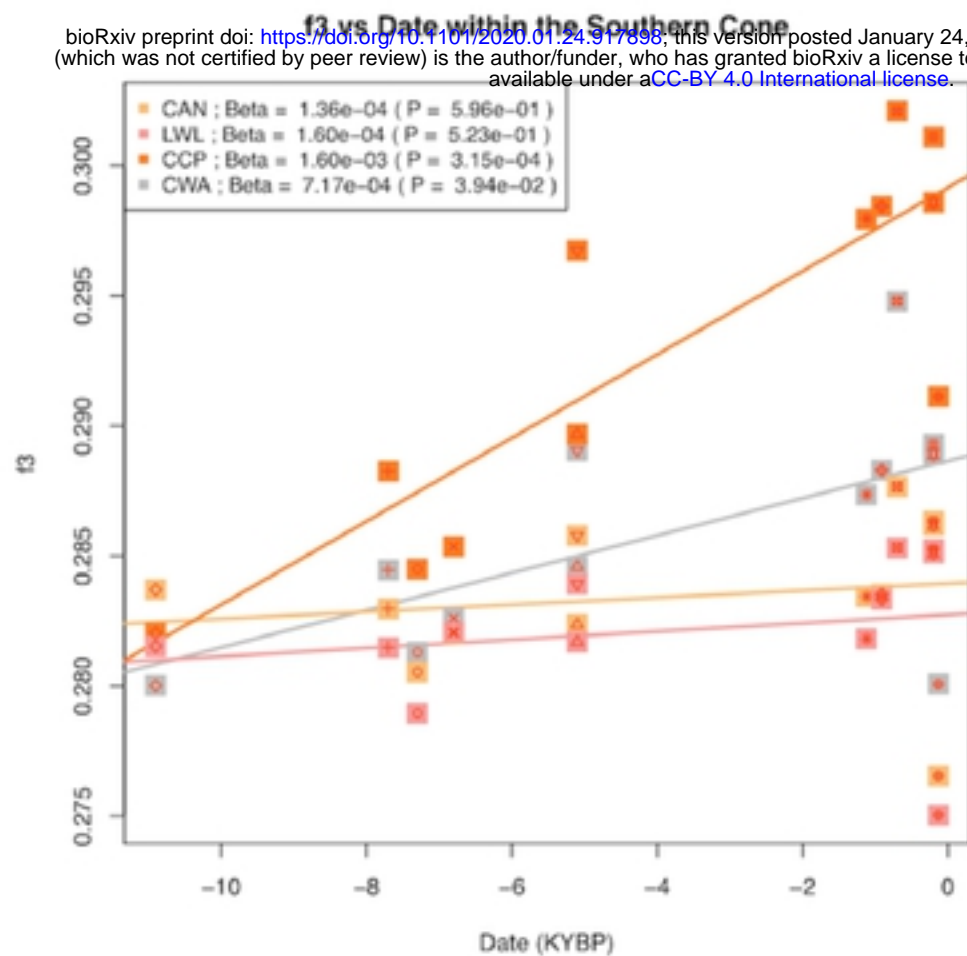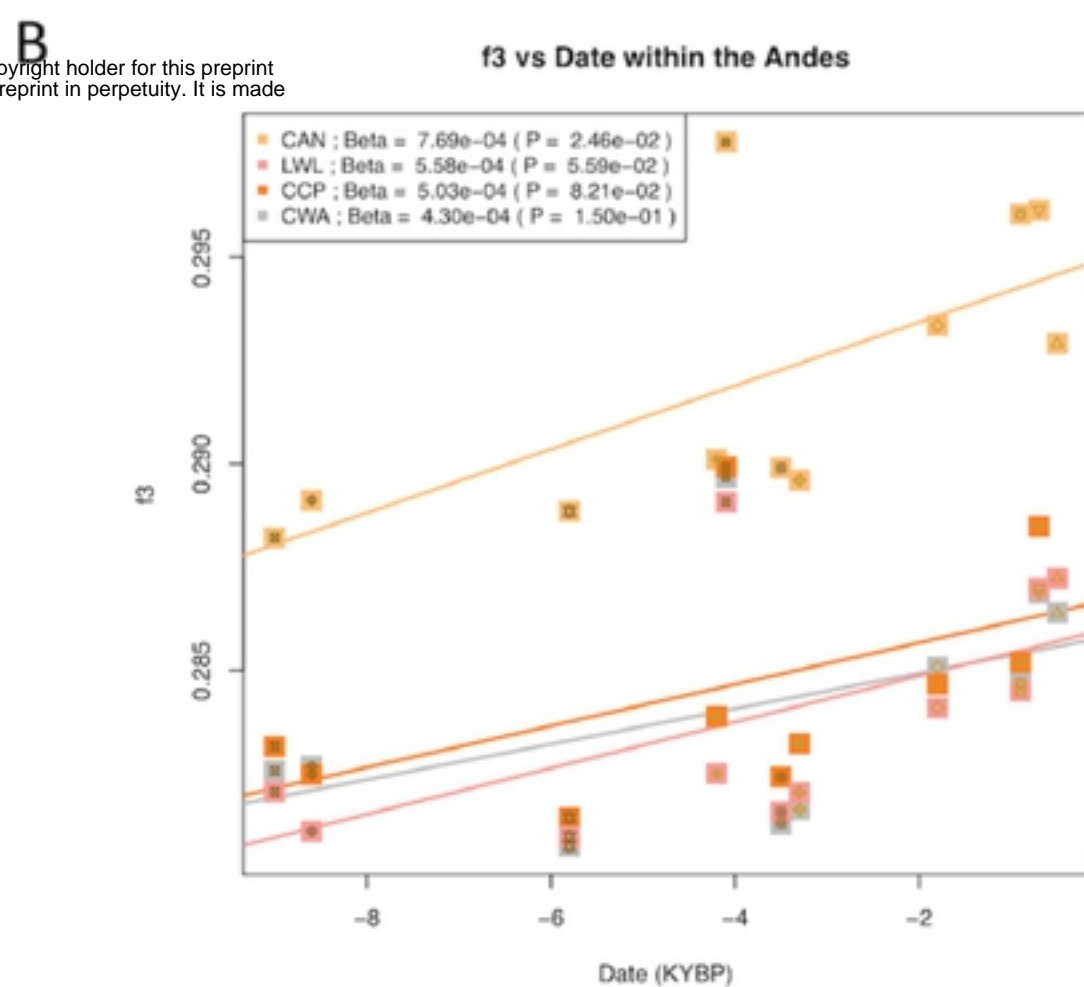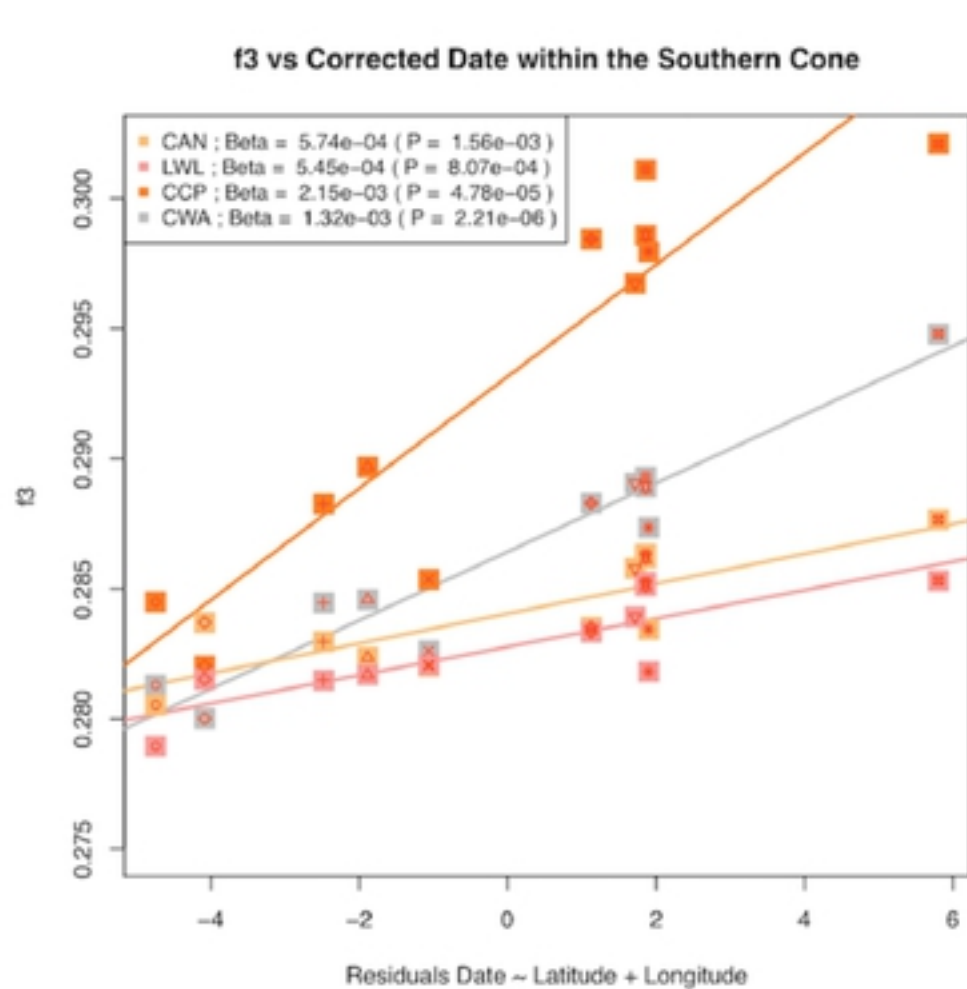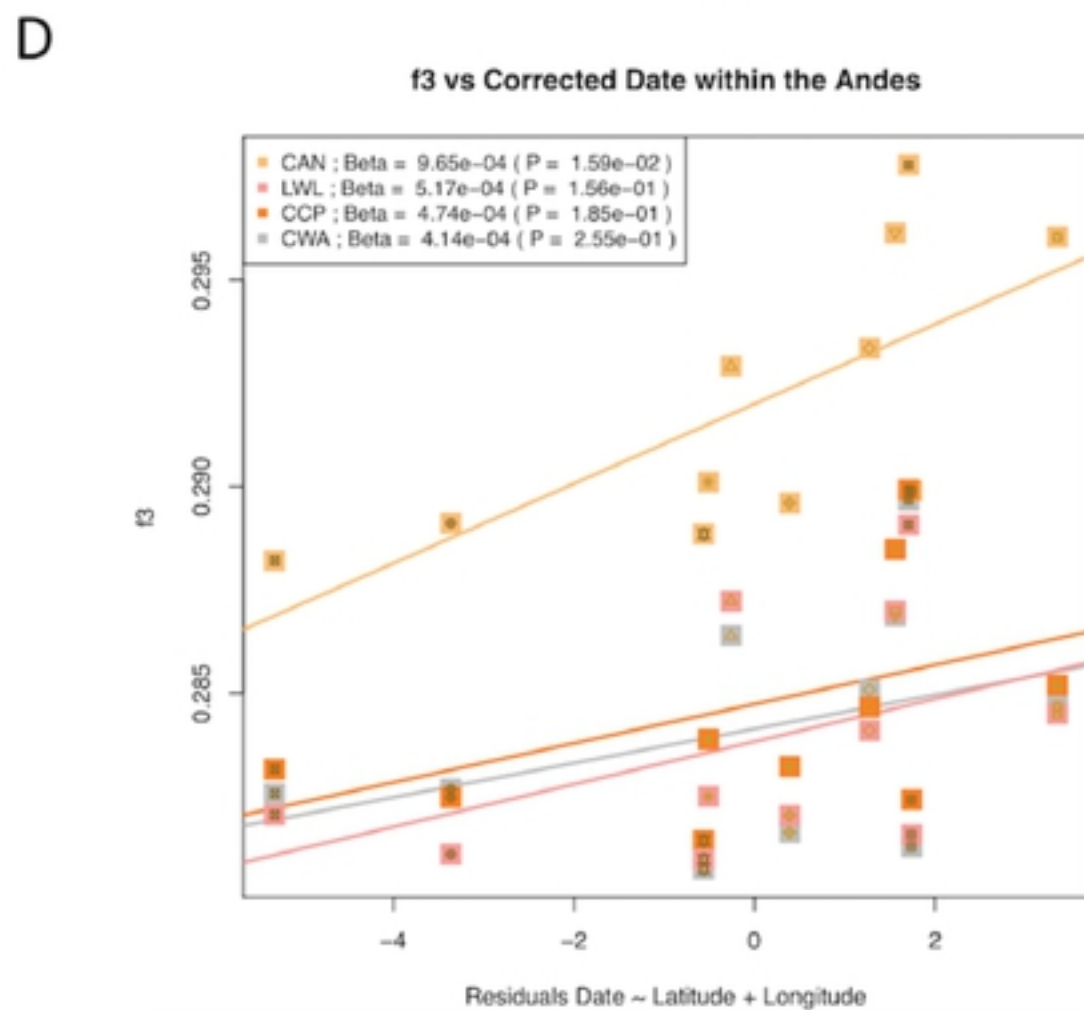

Fig 7. Changes across time of genetic affinity of the four Native A

A.

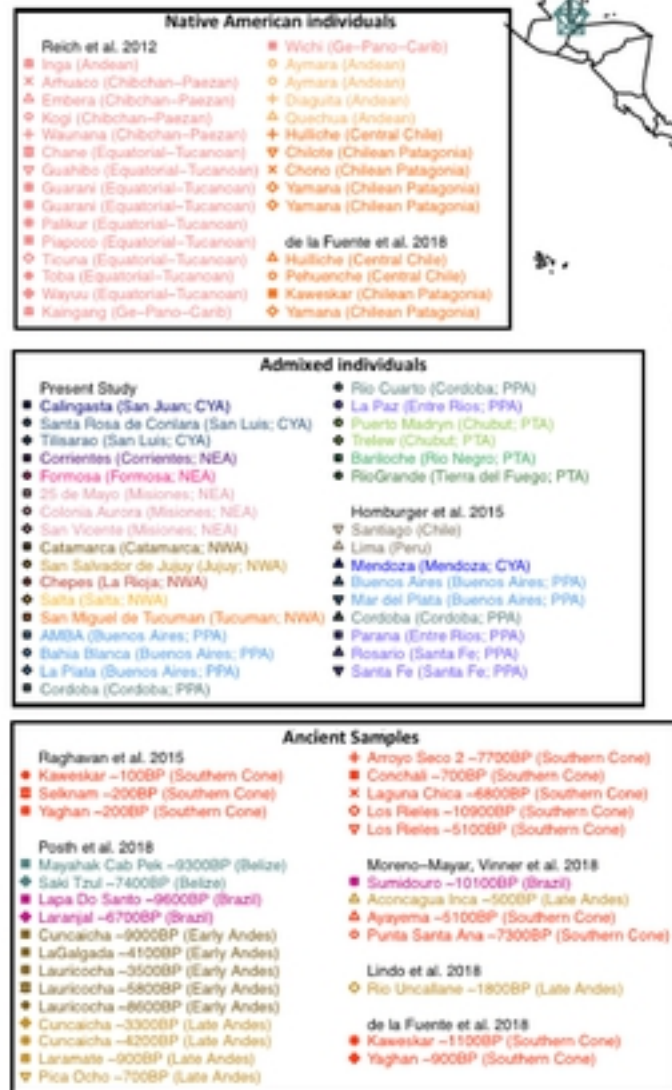

B.

MDS for 4-first PCs based weighted euclidean distance

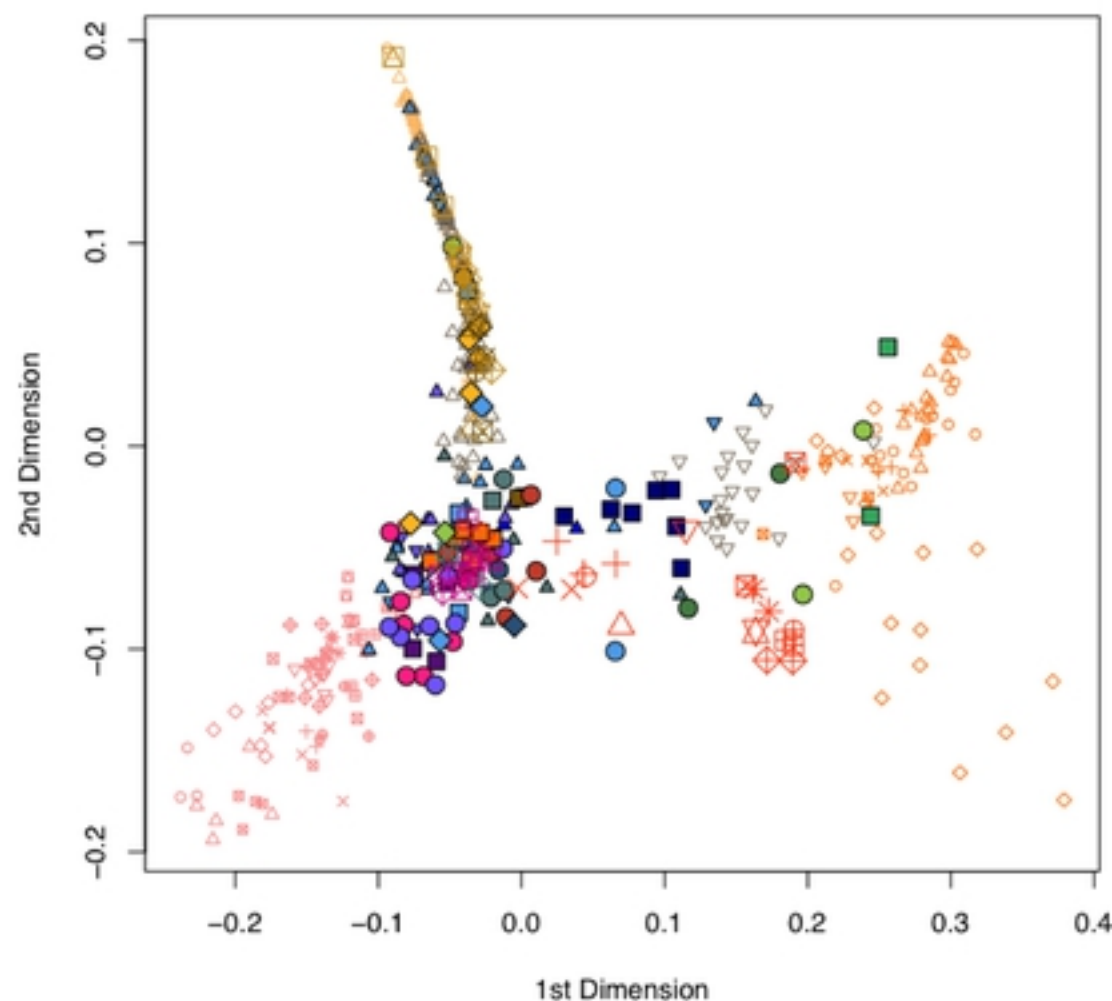

Fig 4. Native American Ancestry-Specific Principal Component Analysis

A.

**1000 Genomes Project**  
 lwk : Luhya (eastern Bantu-Speaking - Kenya)  
 esn : Esan (Western Africa - Nigeria)  
 yri : Yoruba (Western Africa - Nigeria)  
 ged : Mandinka (Western Africa - Gambia)  
 msi : Mende (Western Africa - Sierra Leone)

**Schiebusch et al. 2012**  
 san : San (San - Namibia)  
 xun : Xun (San - Namibia)  
 khr : Khwe (San - Namibia and South Africa)  
 kar : Kamejje (San - South Africa)  
 kho : Khomani (San - South Africa)  
 gui : Gui Ghana Kgal (San - Botswana)  
 ban : Bantu (southern Bantu-Speaking)  
 seb : Southeastern Bantu (southern Bantu-Speaking)

**Pagani et al. 2012**  
 anu : Anuak (Eastern Africa - Ethiopia)  
 gum : Gumuz (Eastern Africa - Ethiopia)  
 sud : Sudanese (Eastern Africa - Sudan)

**Patin et al. 2017**  
 bak : Bakia (western hunter-gatherers - Cameroon)  
 bak : Bakia (western hunter-gatherers - Cameroon)  
 bez : Bezan (western hunter-gatherers - Cameroon)  
 mbu : Mbuti Pygmy (eastern hunter-gatherers - DRC)  
 bab : BabongoE (western hunter-gatherers - Gabon)  
 bky : Bakoya (western hunter-gatherers - Gabon)  
 bia : Biaka Pygmy (western hunter-gatherers - CAR)  
 kim : Kimbundu (western Bantu-Speaking - Angola)  
 kon : Kongo (western Bantu-Speaking - Angola)  
 ovi : Ovimbundu (western Bantu-Speaking - Angola)  
 bad : Badiwe (western Bantu-Speaking - Cameroon)  
 fan : Fang (western Bantu-Speaking - Cameroon)  
 yao : Yaounde (western Bantu-Speaking - Cameroon)  
 ake : Akele (western Bantu-Speaking - Gabon)  
 bkt : Bakota (western Bantu-Speaking - Gabon)  
 bap : Bagunu (western Bantu-Speaking - Gabon)  
 bat : Bateke (western Bantu-Speaking - Gabon)  
 bek : Bekwi (western Bantu-Speaking - Gabon)  
 ben : Bena (western Bantu-Speaking - Gabon)  
 dum : Duma (western Bantu-Speaking - Gabon)  
 esh : Eshira (western Bantu-Speaking - Gabon)  
 evi : Eviya (western Bantu-Speaking - Gabon)  
 gal : Galica (western Bantu-Speaking - Gabon)  
 mak : Makina (western Bantu-Speaking - Gabon)  
 ndu : Ndumu (western Bantu-Speaking - Gabon)  
 nze : Nzebi (western Bantu-Speaking - Gabon)  
 oba : Obamba (western Bantu-Speaking - Gabon)  
 oka : Okande (western Bantu-Speaking - Gabon)  
 onu : Orungu (western Bantu-Speaking - Gabon)  
 sha : Shaika (western Bantu-Speaking - Gabon)  
 tso : Tsogo (western Bantu-Speaking - Gabon)  
 bar : Bariba (Western Africa - Benin)  
 fon : Fon (Western Africa - Benin)  
 yor : Yoruba (Western Africa - Benin)  
 ahi : Ahizi (Western Africa - Ivory Coast)  
 yac : Yacouba (Western Africa - Ivory Coast)

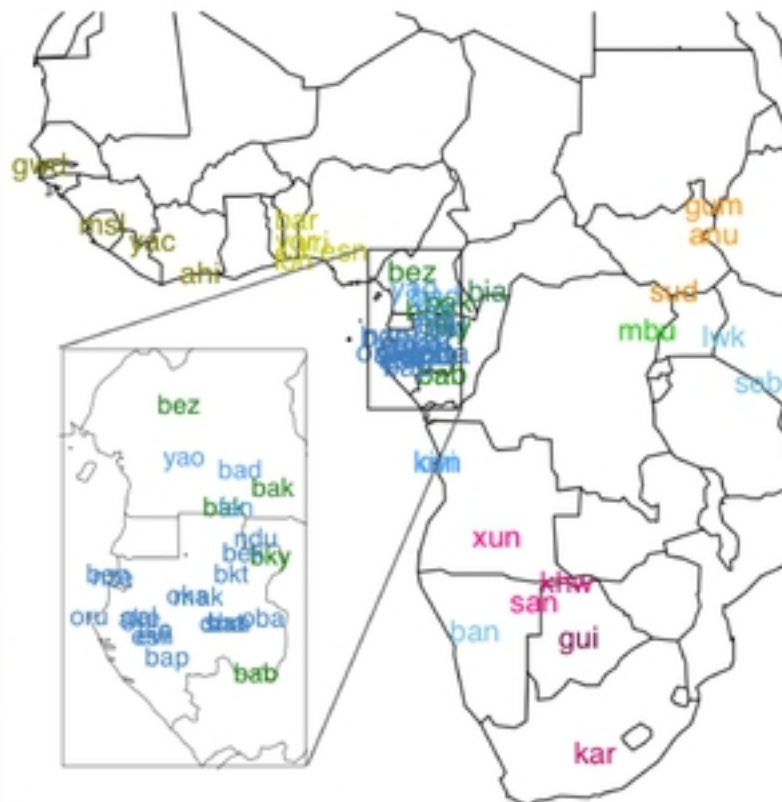

## Present Study

- Calingasta (San Jaan)
- Corrientes (Corrientes)
- Formosa (Formosa)
- 25 de Mayo (Misiones)
- Chepas (La Rioja)
- San Miguel de Tucuman (Tucuman)
- AMBA (Buenos Aires)
- Cordoba (Cordoba)
- Rio Cuarto (Cordoba)
- La Paz (Entre Rios)
- Trelew (Chubut)
- Rio Grande (Tierra del Fuego)

## Homburger et al. 2015

- ▲ Lima (Peru)
- ▲ Buenos Aires (Buenos Aires)
- ▲ Mar del Plata (Buenos Aires)
- Cordoba (Cordoba)
- ▲ Rosario (Santa Fe)
- ▼ Santa Fe (Santa Fe)

B.

MDS for 5-first PCs based weighted euclidean distance

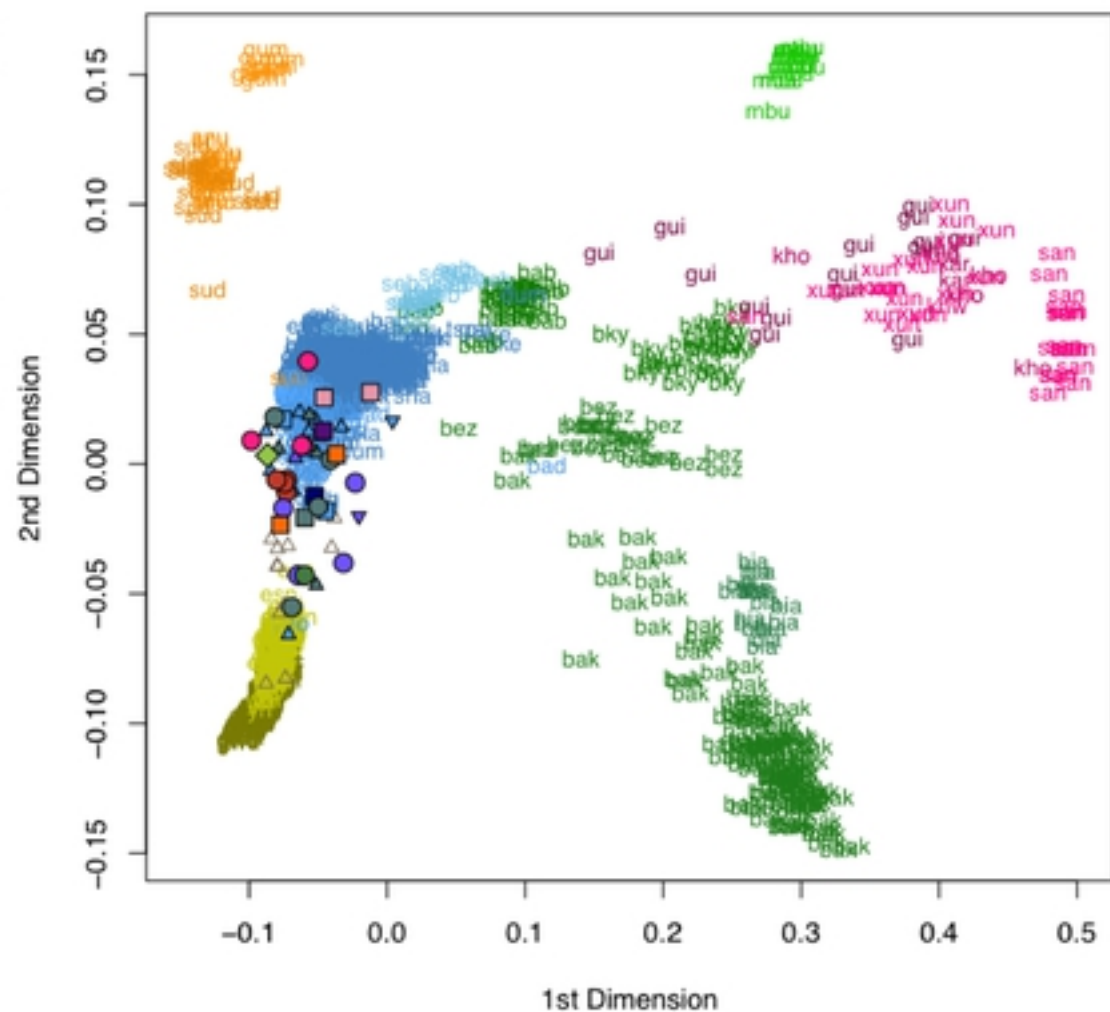

Fig 2. African Ancestry-Specific Principal Component Analysis.

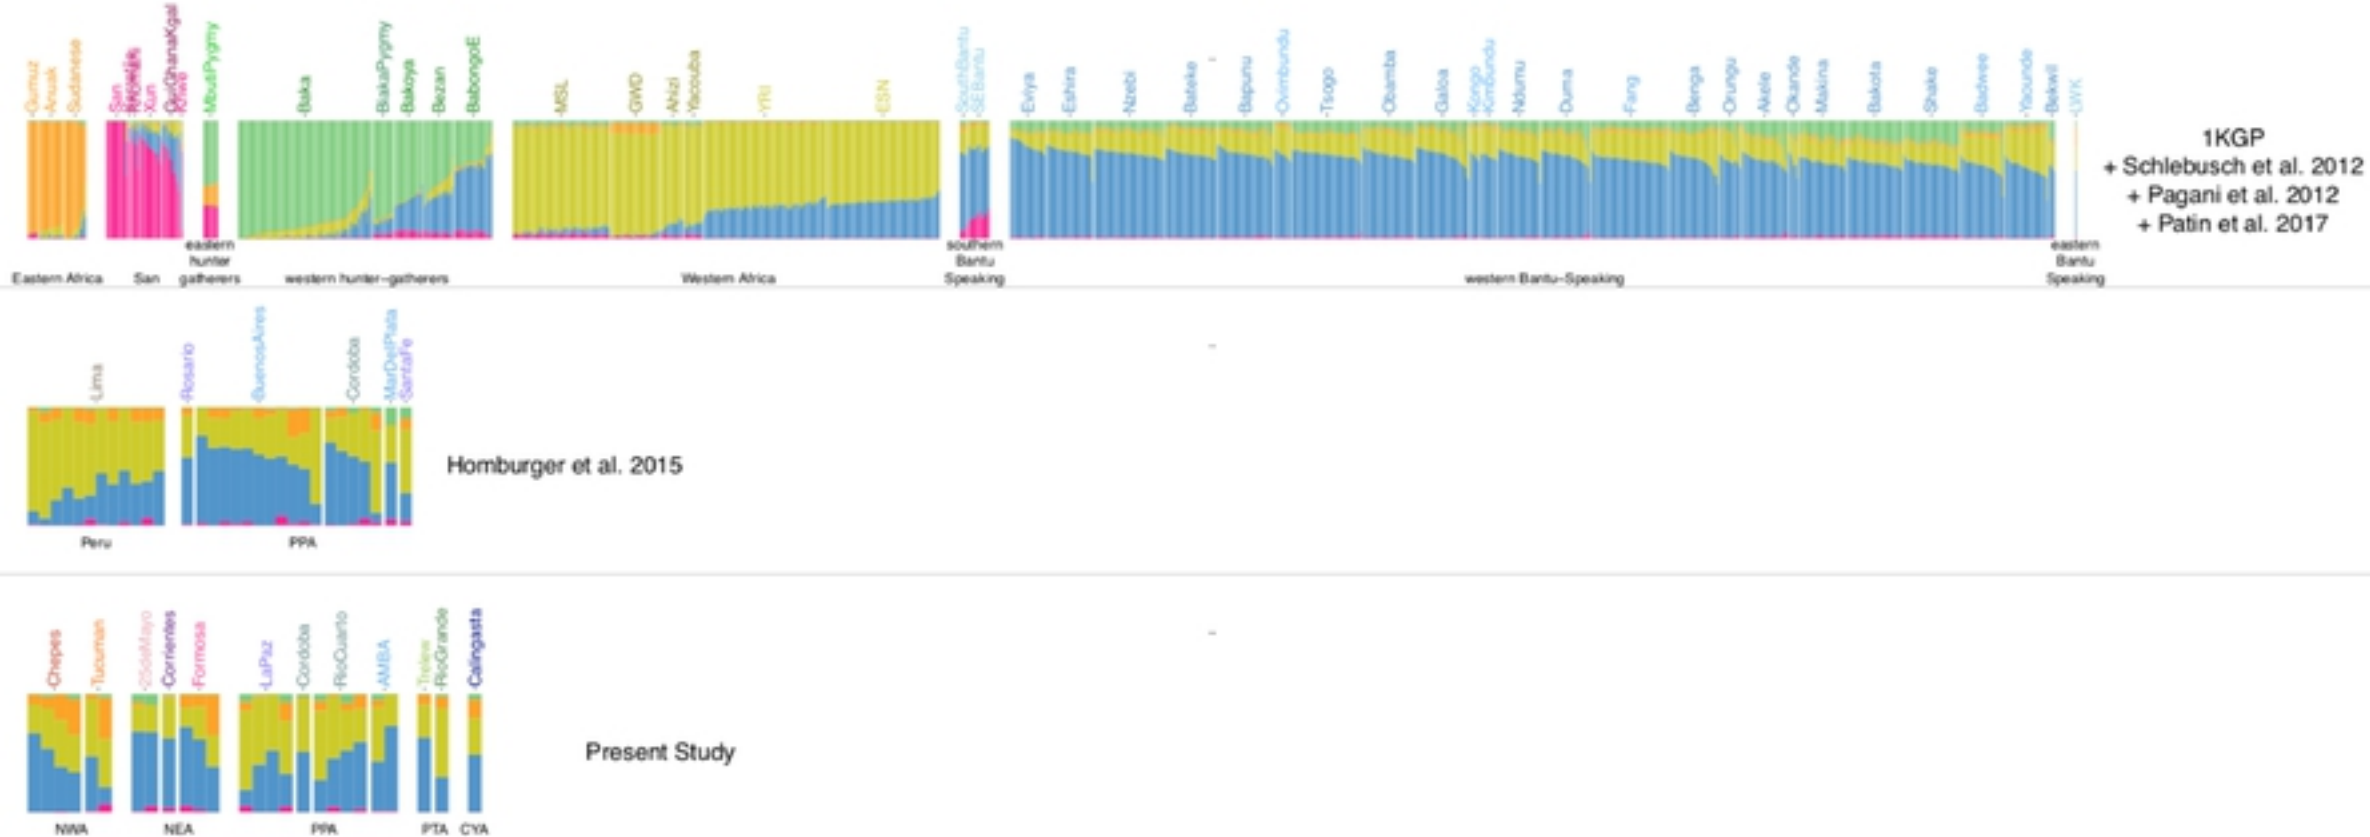

Fig 3. African Ancestry-Specific Admixture Analysis.
